# Supplementary material for: Coordination-driven self-assembly of chiral palladium(ii)-based supramolecular triangle structures
Source: Royal Society of Chemistry journal article supplement (doi:10.1039/c8nj02804d), 2018-01-01

## Coordination-driven self-assembly of chiral palladium(II)-based supramolecular triangles structures

### Electronic supporting information

#### Content

|                                                                                                        |    |
|--------------------------------------------------------------------------------------------------------|----|
| <sup>1</sup> H/ <sup>13</sup> C NMR spectra of SCCs <b>2-5</b> .....                                   | 2  |
| <sup>1</sup> H/ <sup>13</sup> C NMR spectra of <b>2</b> .....                                          | 2  |
| <sup>1</sup> H/ <sup>13</sup> C NMR spectra of <b>3</b> .....                                          | 3  |
| <sup>1</sup> H/ <sup>13</sup> C NMR spectra of <b>4</b> .....                                          | 4  |
| <sup>1</sup> H/ <sup>13</sup> C NMR spectra of <b>5</b> .....                                          | 5  |
| <sup>1</sup> H NMR spectra of SCCs <b>2-4</b> as a function of concentration.....                      | 6  |
| <sup>1</sup> H NMR spectra of <b>2</b> as a function of its concentration (S1).....                    | 6  |
| <sup>1</sup> H NMR spectra of <b>3</b> as a function of its concentration (S2).....                    | 6  |
| <sup>1</sup> H NMR spectra of <b>4</b> as a function of its concentration (S3).....                    | 7  |
| <sup>1</sup> H NMR spectra of <b>5</b> as a function of its concentration (S4).....                    | 7  |
| DOSY spectra of SCCs <b>2-4</b> .....                                                                  | 8  |
| DOSY spectrum of <b>2</b> (S5).....                                                                    | 8  |
| DOSY spectrum of <b>3</b> (S6).....                                                                    | 8  |
| DOSY spectrum of <b>4</b> (S7).....                                                                    | 9  |
| DOSY spectrum of <b>5</b> (S8).....                                                                    | 9  |
| <sup>1</sup> H NMR spectrum of triangle/square <b>3</b> in D <sub>2</sub> O as the nitrate salts.....  | 10 |
| Diffusion coefficients of triangle/square <b>3</b> in D <sub>2</sub> O as the nitrate salts (S13)..... | 11 |
| CSI spectra of SCCs <b>2-4</b> .....                                                                   | 16 |
| CSI mass spectrum of <b>2</b> (S9).....                                                                | 16 |
| CSI mass spectrum of <b>3</b> (S10).....                                                               | 17 |
| CSI mass spectrum of <b>4</b> (S11).....                                                               | 18 |
| CSI mass spectrum of <b>5</b> (S12).....                                                               | 19 |
| ROESY spectra of SCCs <b>2-4</b> at 233K.....                                                          | 20 |
| ROESY spectrum of <b>2</b> at 233K.....                                                                | 20 |
| ROESY spectrum of <b>3</b> at 233K.....                                                                | 20 |
| ROESY spectrum of <b>4</b> at 233K.....                                                                | 21 |
| ROESY spectrum of <b>5</b> at 233K.....                                                                | 22 |
| <sup>1</sup> H VT-NMR spectra of SCCs <b>2-4</b> .....                                                 | 23 |
| <sup>1</sup> H VT-NMR spectra of <b>2</b> .....                                                        | 23 |
| <sup>1</sup> H VT-NMR spectra of <b>3</b> (S15).....                                                   | 23 |
| <sup>1</sup> H VT-NMR spectra of <b>4</b> .....                                                        | 24 |
| <sup>1</sup> H VT-NMR spectra of <b>5</b> (S14).....                                                   | 24 |
| ROESY NMR spectra of SCCs <b>3</b> and <b>5</b> at low temperatures.....                               | 25 |
| ROESY spectrum of <b>3</b> at 188K (S16).....                                                          | 25 |
| ROESY spectrum of <b>5</b> at 193K (S17).....                                                          | 25 |



$^1\text{H}/^{13}\text{C}$  NMR spectra of **3**

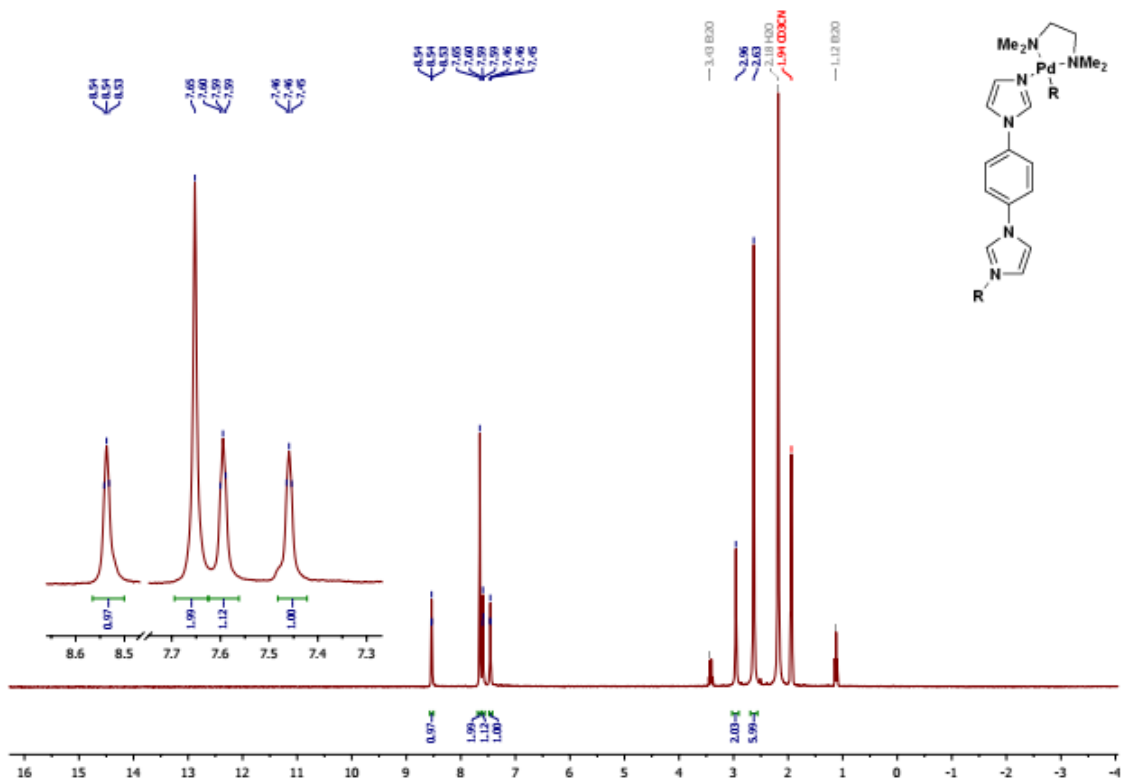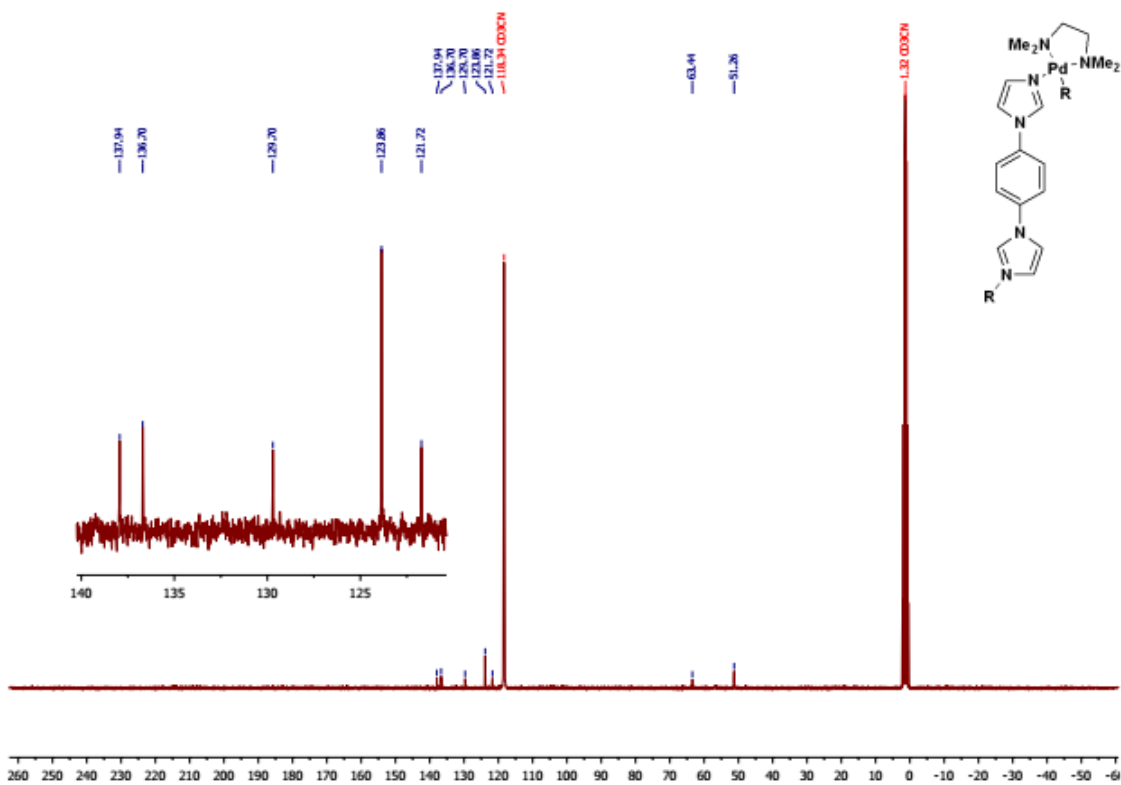

$^1\text{H}/^{13}\text{C}$  NMR spectra of **4**

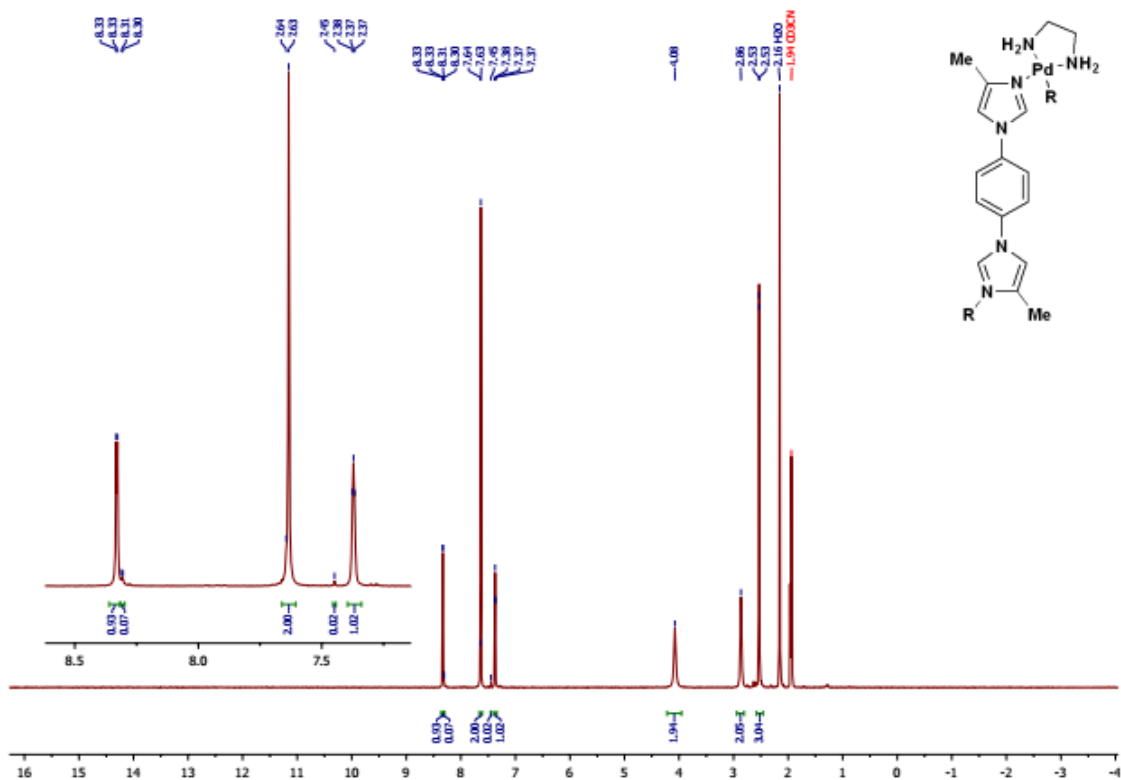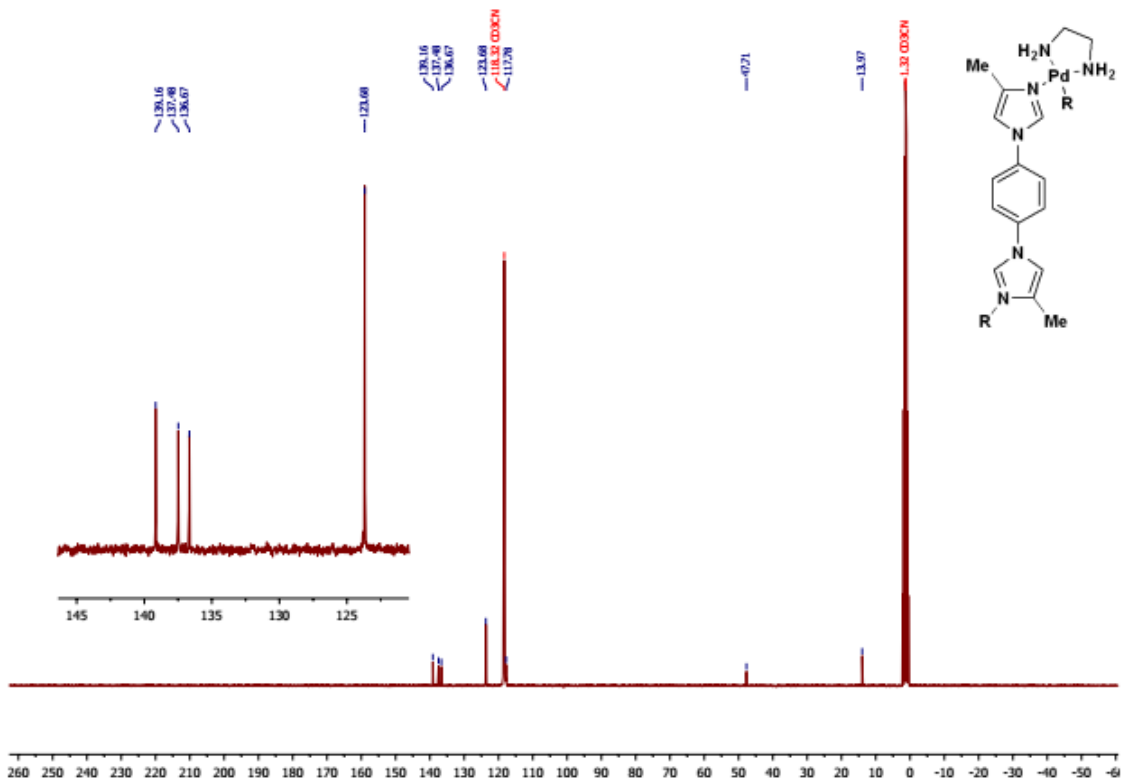

$^1\text{H}/^{13}\text{C}$  NMR spectra of **5**

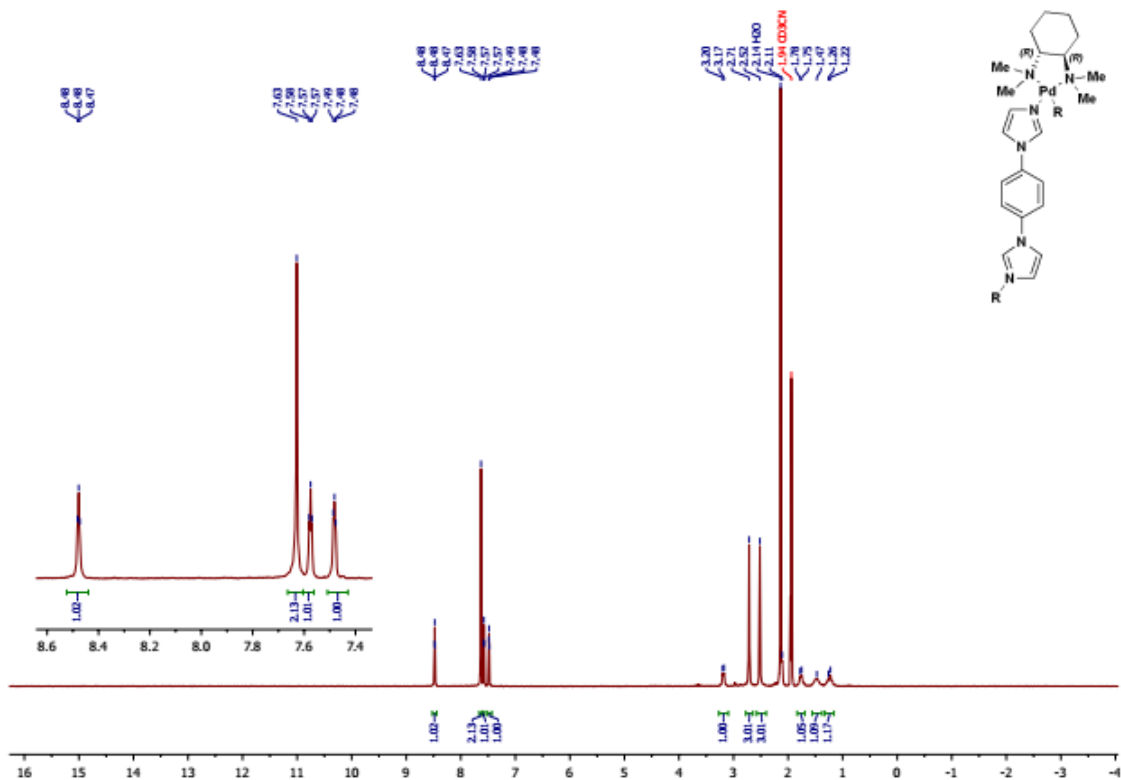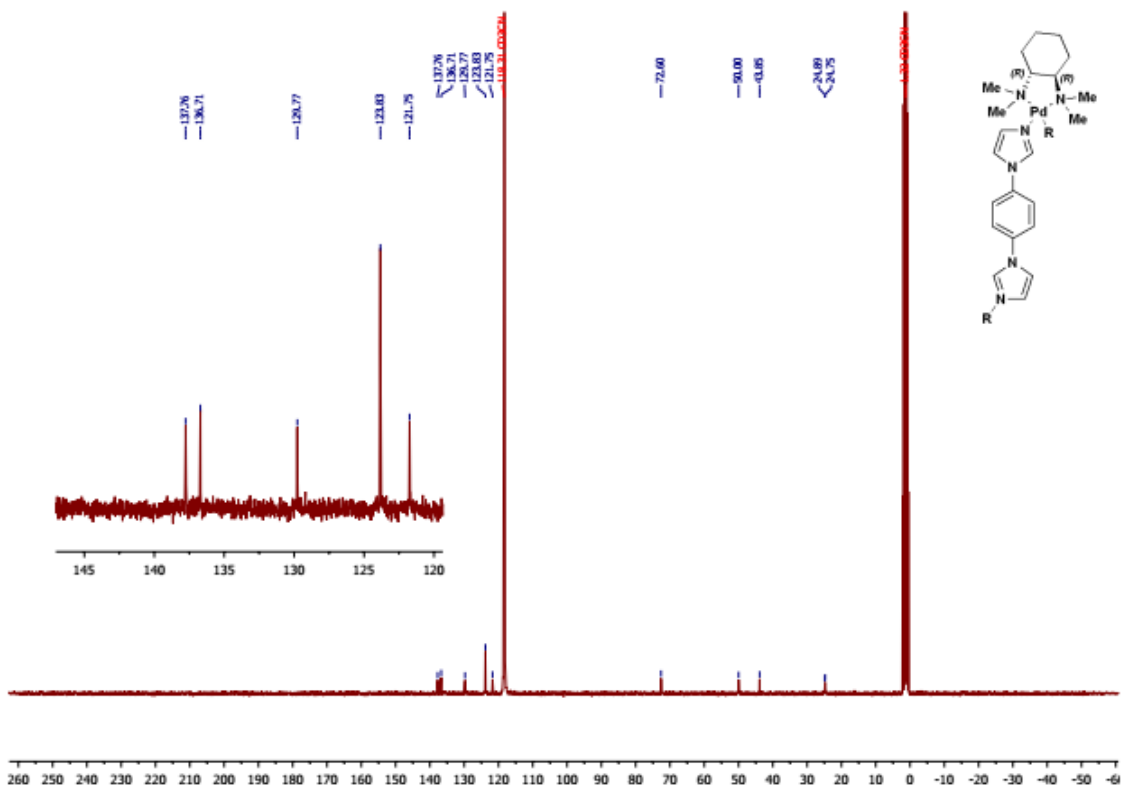

### <sup>1</sup>H NMR spectra of SCCs 2-4 as a function of concentration

<sup>1</sup>H NMR spectra of **2** as a function of its concentration (S1)

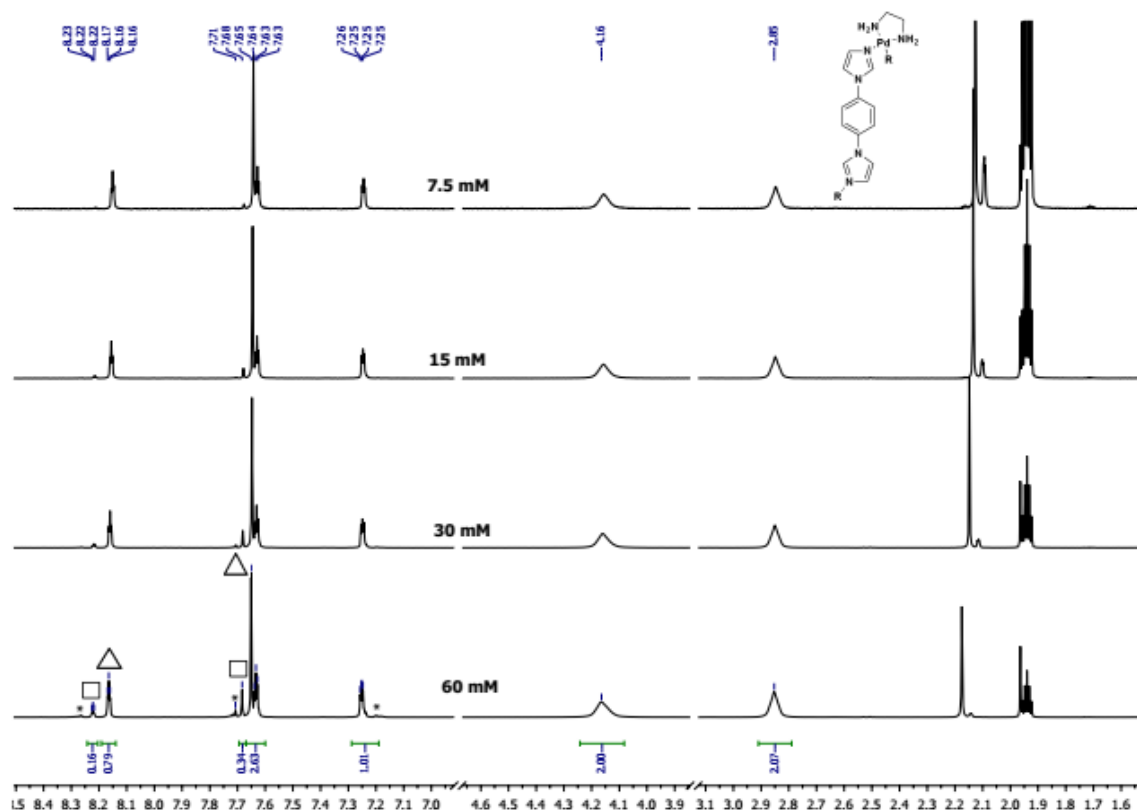

<sup>1</sup>H NMR spectra of **3** as a function of its concentration (S2)

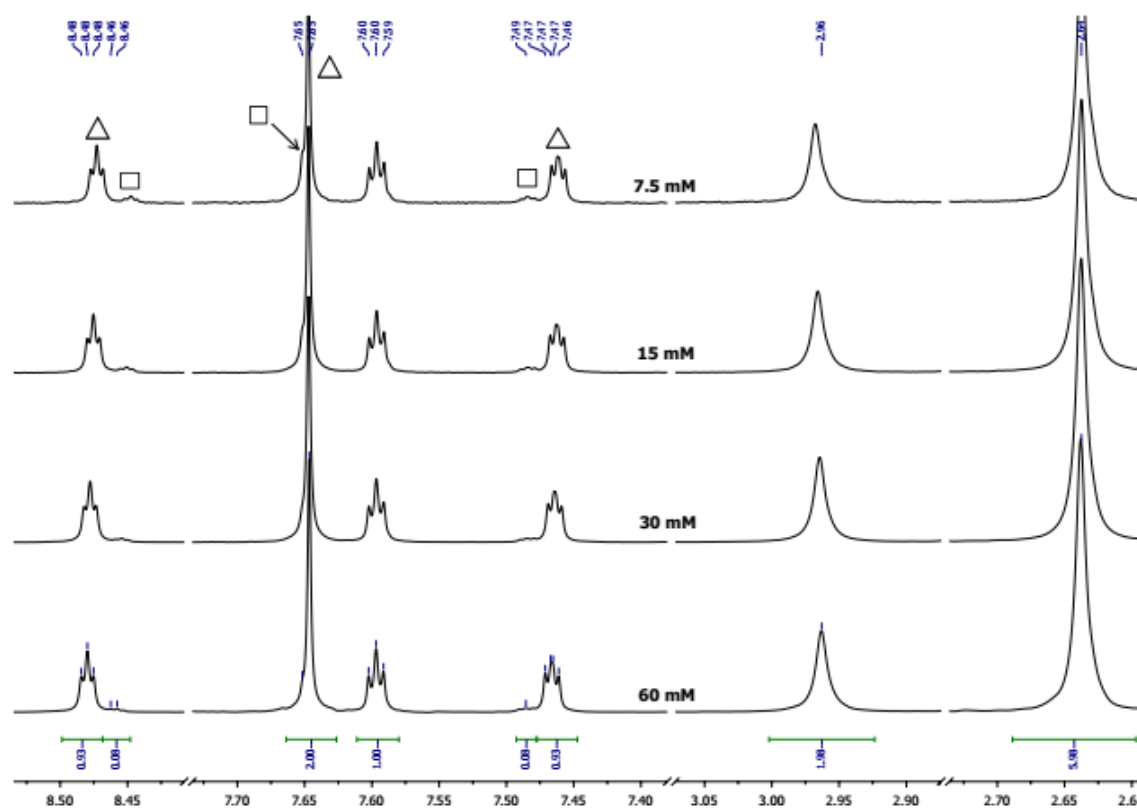

$^1\text{H}$  NMR spectra of **4** as a function of its concentration (S3)

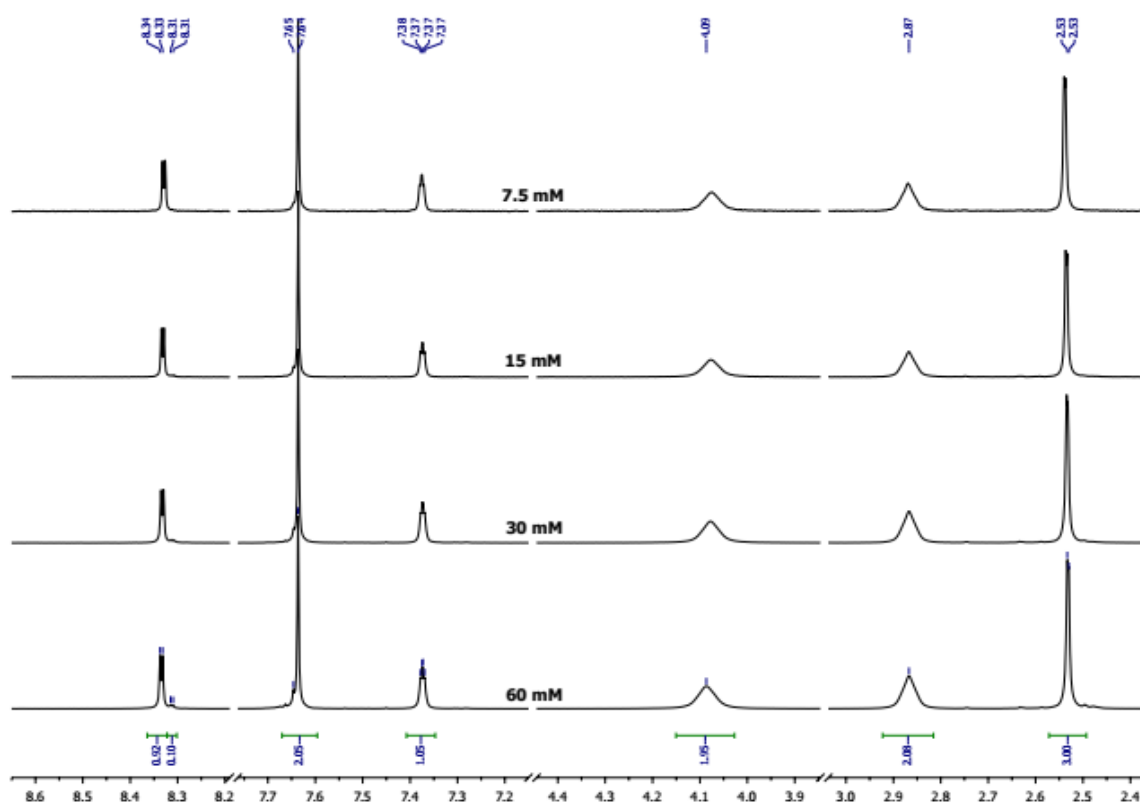

$^1\text{H}$  NMR spectra of **5** as a function of its concentration (S4)

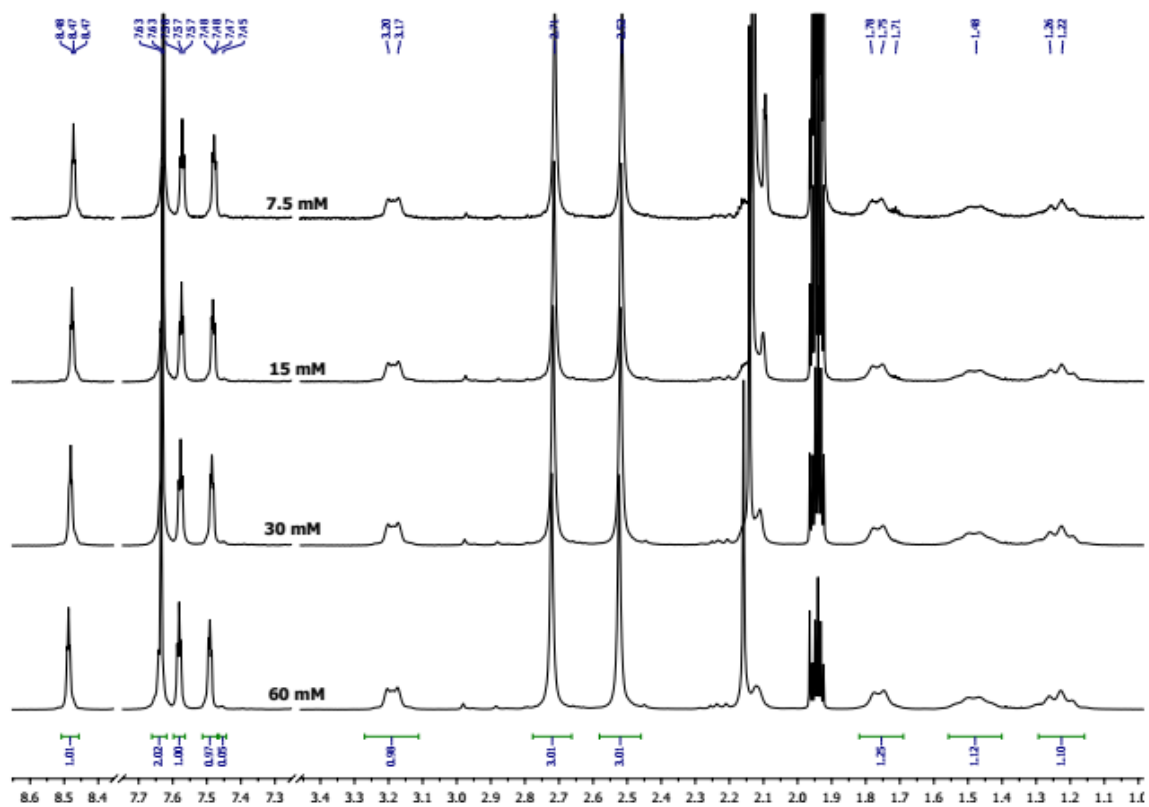

## DOSY spectra of SCCs 2-4

### DOSY spectrum of 2 (S5)

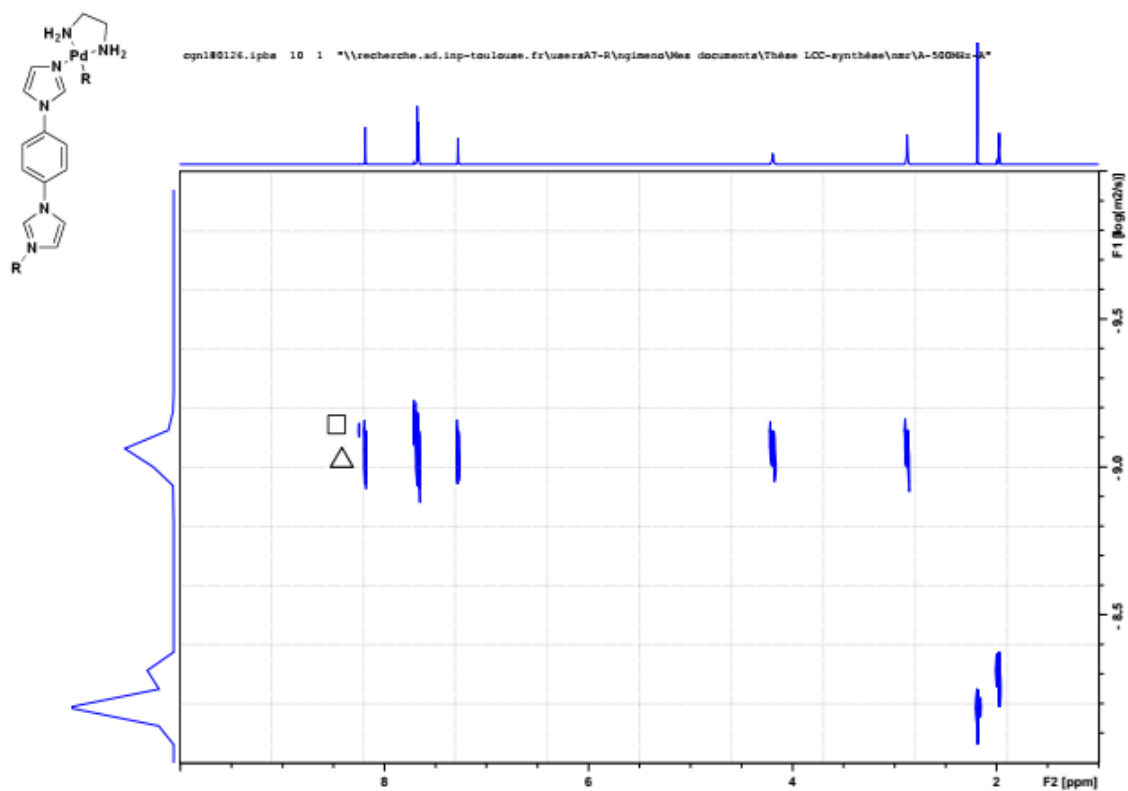

### DOSY spectrum of 3 (S6)

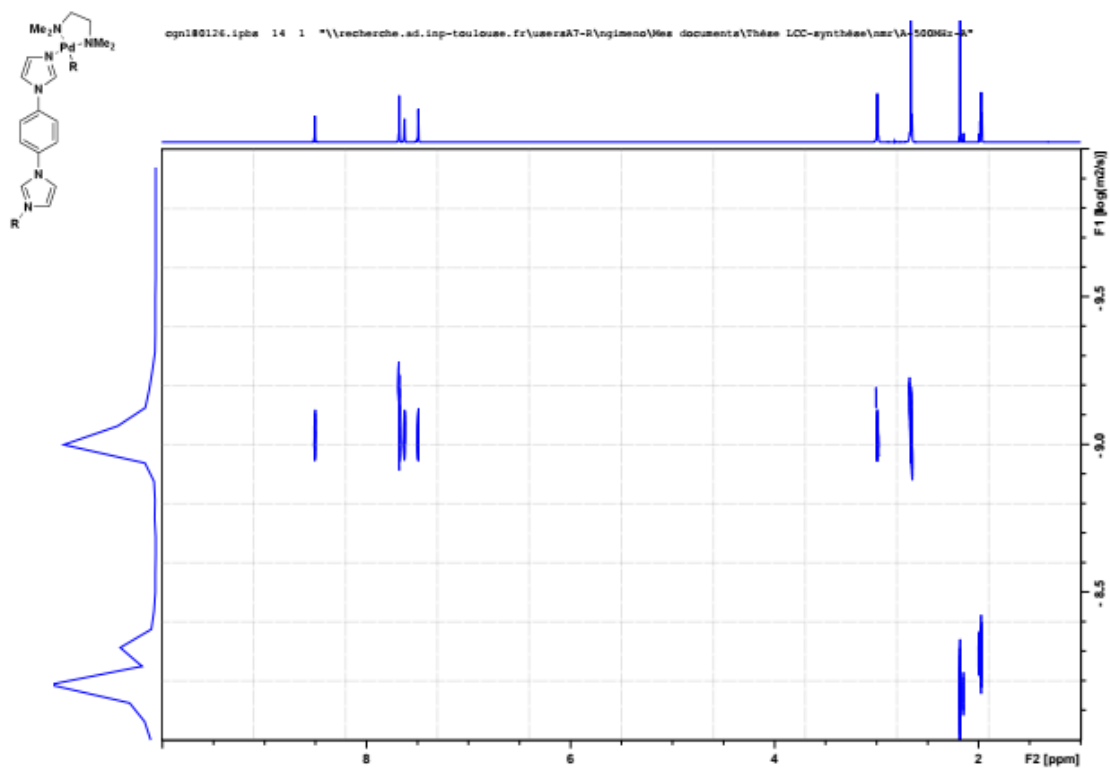



### DOSY spectrum of 4 (S7)

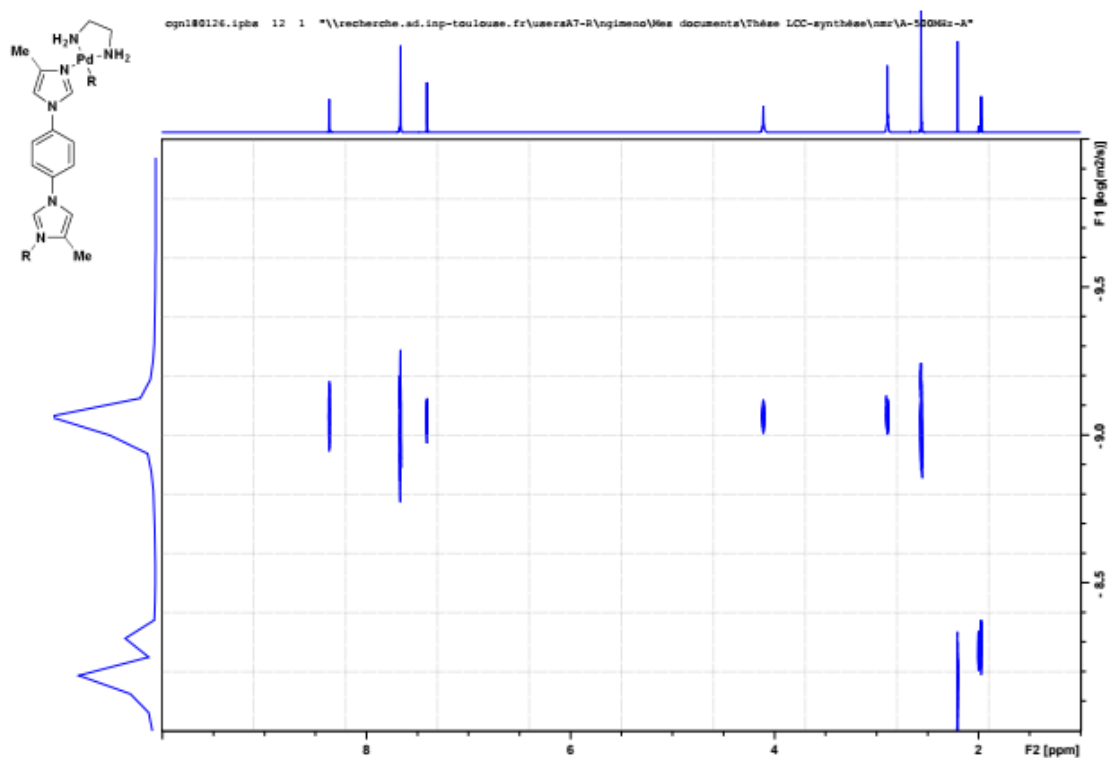

### DOSY spectrum of 5 (S8)

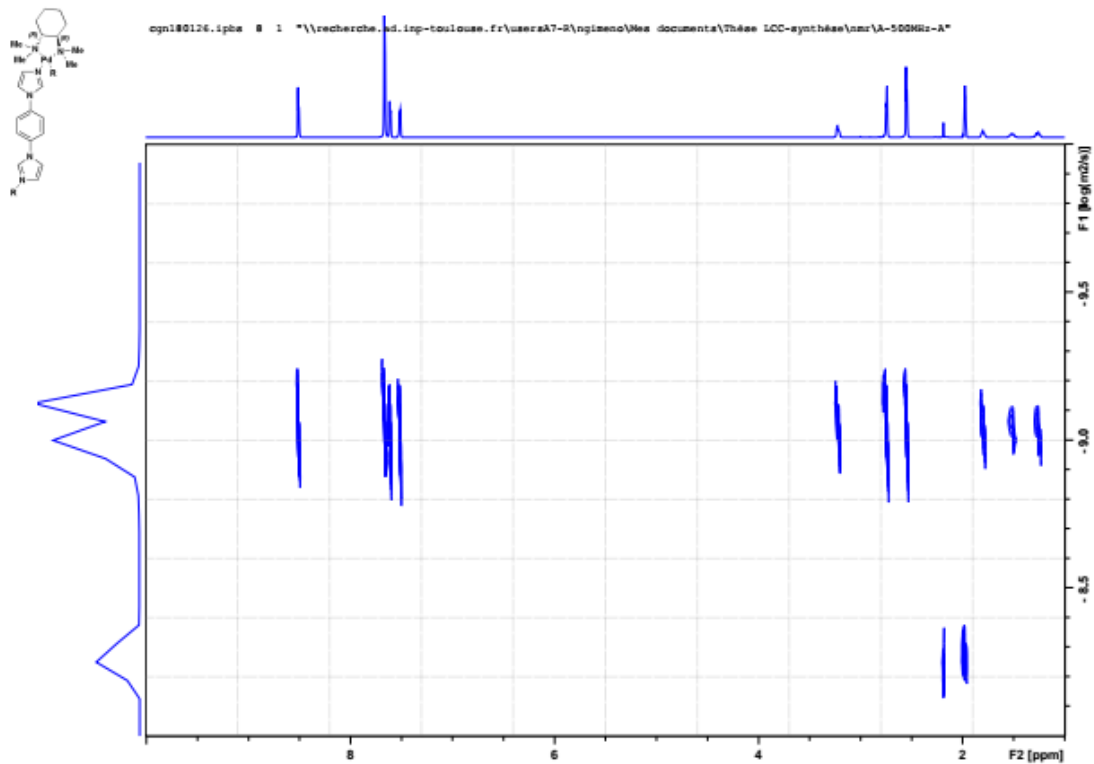

$^1\text{H}$  NMR spectrum of triangle/square **3** in  $\text{D}_2\text{O}$  as the nitrate salts

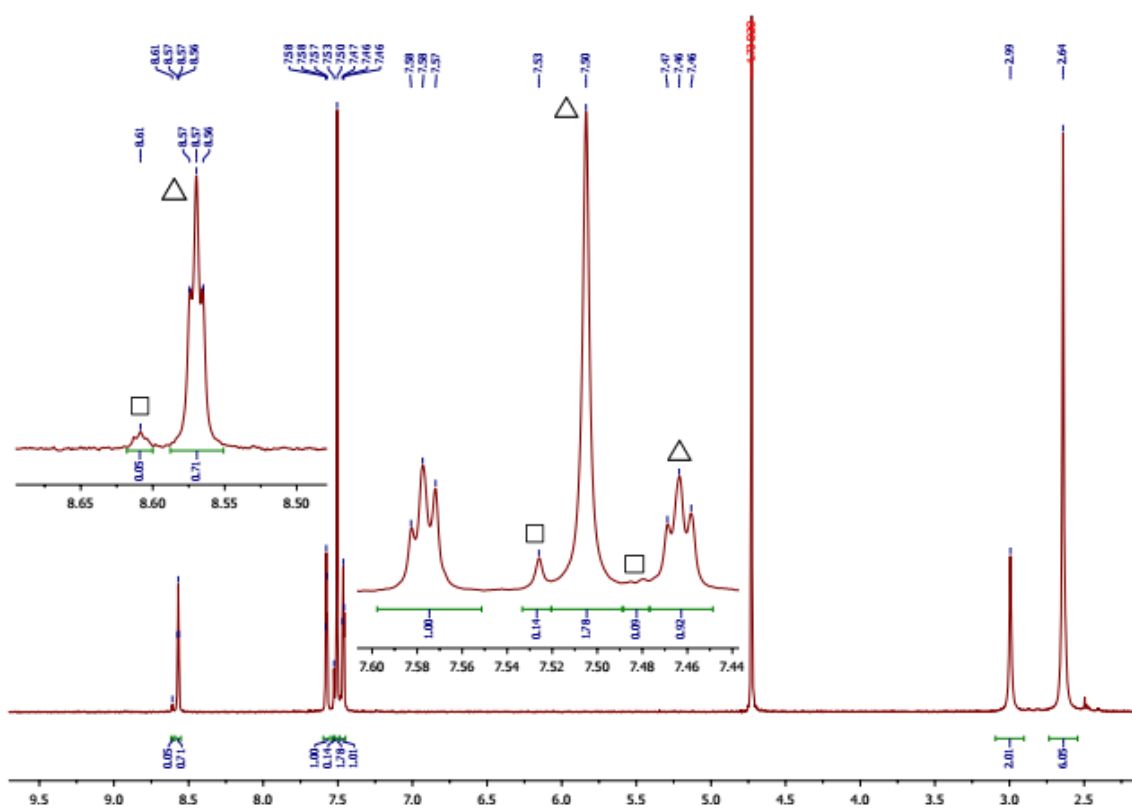

# Diffusion coefficients of triangle/square 3 in D<sub>2</sub>O as the nitrate salts (S13)

Thu Feb 01 17:38:52 CET 2018

## SIMFIT RESULTS

Dataset : //recherche.ad.inp-toulouse.fr/usersA7-R/ngimeno/Mes documents/Th  
 AREA fit : Diffusion : Variable Gradient :

$I=I[0]*\exp(-D*\text{SQR}(2*\text{PI}*\text{gamma}*\text{Gi}*\text{LD})*(\text{BD}-\text{LD}/3)*1e4)$

16 points for Integral 1, Integral Region from 8.583 to 8.567 ppm

Converged after 68 iterations!

Results Comp. 1

I[0] - 1.534e-002  
 Diff Con. - 1.717e-010 m<sup>2</sup>/s  
 Gamma - 4.258e+003 Hz/G  
 Little Delta - 2.800m  
 Big Delta - 129.900m

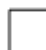

RSS - 5.657e-007

SD - 1.880e-004

| Point | Gradient   | Expt       | Calc       | Difference  |
|-------|------------|------------|------------|-------------|
| 1     | 1.120e+000 | 1.555e-002 | 1.531e-002 | -2.327e-004 |
| 2     | 4.592e+000 | 1.531e-002 | 1.494e-002 | -3.709e-004 |
| 3     | 8.064e+000 | 1.390e-002 | 1.415e-002 | 2.440e-004  |
| 4     | 1.154e+001 | 1.266e-002 | 1.300e-002 | 3.407e-004  |
| 5     | 1.501e+001 | 1.146e-002 | 1.159e-002 | 1.336e-004  |
| 6     | 1.848e+001 | 9.862e-003 | 1.003e-002 | 1.717e-004  |
| 7     | 2.195e+001 | 8.381e-003 | 8.427e-003 | 4.639e-005  |
| 8     | 2.542e+001 | 7.128e-003 | 6.869e-003 | -2.591e-004 |
| 9     | 2.890e+001 | 5.574e-003 | 5.434e-003 | -1.401e-004 |
| 10    | 3.237e+001 | 4.054e-003 | 4.172e-003 | 1.180e-004  |
| 11    | 3.584e+001 | 3.232e-003 | 3.108e-003 | -1.241e-004 |
| 12    | 3.931e+001 | 2.166e-003 | 2.247e-003 | 8.111e-005  |
| 13    | 4.278e+001 | 1.684e-003 | 1.577e-003 | -1.075e-004 |
| 14    | 4.626e+001 | 1.042e-003 | 1.074e-003 | 3.154e-005  |
| 15    | 4.973e+001 | 8.106e-004 | 7.097e-004 | -1.009e-004 |
| 16    | 5.320e+001 | 3.955e-004 | 4.552e-004 | 5.973e-005  |

16 points for Integral 2, Integral Region from 8.554 to 8.525 ppm

Converged after 54 iterations!

Results Comp. 1

I[0] - 1.867e-001  
 Diff Con. - 2.008e-010 m<sup>2</sup>/s  
 Gamma - 4.258e+003 Hz/G  
 Little Delta - 2.800m  
 Big Delta - 129.900m

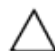

RSS - 8.675e-006

(1/5)

Thu Feb 01 17:38:52 CET 2018

SD - 7.363e-004

| Point | Gradient   | Expt       | Calc       | Difference  |
|-------|------------|------------|------------|-------------|
| 1     | 1.120e+000 | 1.861e-001 | 1.863e-001 | 2.704e-004  |
| 2     | 4.592e+000 | 1.804e-001 | 1.810e-001 | 6.546e-004  |
| 3     | 8.064e+000 | 1.689e-001 | 1.698e-001 | 9.455e-004  |
| 4     | 1.154e+001 | 1.540e-001 | 1.538e-001 | -1.392e-004 |
| 5     | 1.501e+001 | 1.360e-001 | 1.346e-001 | -1.434e-003 |
| 6     | 1.848e+001 | 1.150e-001 | 1.136e-001 | -1.317e-003 |
| 7     | 2.195e+001 | 9.369e-002 | 9.267e-002 | -1.018e-003 |
| 8     | 2.542e+001 | 7.285e-002 | 7.297e-002 | 1.173e-004  |
| 9     | 2.890e+001 | 5.452e-002 | 5.547e-002 | 9.535e-004  |
| 10    | 3.237e+001 | 3.977e-002 | 4.072e-002 | 9.488e-004  |
| 11    | 3.584e+001 | 2.818e-002 | 2.886e-002 | 6.809e-004  |
| 12    | 3.931e+001 | 1.939e-002 | 1.975e-002 | 3.677e-004  |
| 13    | 4.278e+001 | 1.302e-002 | 1.305e-002 | 3.676e-005  |
| 14    | 4.626e+001 | 8.266e-003 | 8.330e-003 | 6.400e-005  |
| 15    | 4.973e+001 | 5.065e-003 | 5.132e-003 | 6.683e-005  |
| 16    | 5.320e+001 | 3.069e-003 | 3.053e-003 | -1.613e-005 |

-----  
16 points for Integral 3, Integral Region from 7.497 to 7.486 ppm

Converged after 64 iterations!

Results Comp. 1

I[0] - 5.218e-002  
Diff Con. - 1.911e-010 m2/s  
Gamma - 4.258e+003 Hz/G  
Little Delta - 2.800m  
Big Delta - 129.900m

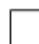

RSS - 1.394e-005

SD - 9.333e-004

| Point | Gradient   | Expt       | Calc       | Difference  |
|-------|------------|------------|------------|-------------|
| 1     | 1.120e+000 | 5.312e-002 | 5.209e-002 | -1.030e-003 |
| 2     | 4.592e+000 | 5.207e-002 | 5.068e-002 | -1.386e-003 |
| 3     | 8.064e+000 | 4.835e-002 | 4.769e-002 | -6.588e-004 |
| 4     | 1.154e+001 | 4.176e-002 | 4.341e-002 | 1.650e-003  |
| 5     | 1.501e+001 | 3.636e-002 | 3.822e-002 | 1.858e-003  |
| 6     | 1.848e+001 | 3.141e-002 | 3.254e-002 | 1.127e-003  |
| 7     | 2.195e+001 | 2.602e-002 | 2.680e-002 | 7.778e-004  |
| 8     | 2.542e+001 | 2.198e-002 | 2.134e-002 | -6.381e-004 |
| 9     | 2.890e+001 | 1.728e-002 | 1.644e-002 | -8.363e-004 |
| 10    | 3.237e+001 | 1.296e-002 | 1.225e-002 | -7.087e-004 |
| 11    | 3.584e+001 | 9.198e-003 | 8.831e-003 | -3.670e-004 |
| 12    | 3.931e+001 | 6.424e-003 | 6.156e-003 | -2.686e-004 |

(2/5)

Thu Feb 01 17:38:52 CET 2018

|    |            |            |            |             |
|----|------------|------------|------------|-------------|
| 13 | 4.278e+001 | 4.554e-003 | 4.150e-003 | -4.039e-004 |
| 14 | 4.626e+001 | 3.190e-003 | 2.706e-003 | -4.838e-004 |
| 15 | 4.973e+001 | 2.188e-003 | 1.707e-003 | -4.810e-004 |
| 16 | 5.320e+001 | 1.206e-003 | 1.041e-003 | -1.645e-004 |

-----  
16 points for Integral 4, Integral Region from 7.481 to 7.461 ppm

Converged after 49 iterations!

Results Comp. 1

I[0] - 4.446e-001  
Diff Con. - 1.996e-010 m2/s  
Gamma - 4.258e+003 Hz/G  
Little Delta - 2.800m  
Big Delta - 129.900m

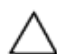

RSS - 7.236e-005

SD - 2.127e-003

| Point | Gradient   | Expt       | Calc       | Difference  |
|-------|------------|------------|------------|-------------|
| 1     | 1.120e+000 | 4.434e-001 | 4.438e-001 | 3.825e-004  |
| 2     | 4.592e+000 | 4.297e-001 | 4.312e-001 | 1.572e-003  |
| 3     | 8.064e+000 | 4.015e-001 | 4.047e-001 | 3.255e-003  |
| 4     | 1.154e+001 | 3.670e-001 | 3.668e-001 | -1.368e-004 |
| 5     | 1.501e+001 | 3.240e-001 | 3.211e-001 | -2.917e-003 |
| 6     | 1.848e+001 | 2.761e-001 | 2.714e-001 | -4.663e-003 |
| 7     | 2.195e+001 | 2.249e-001 | 2.216e-001 | -3.268e-003 |
| 8     | 2.542e+001 | 1.745e-001 | 1.748e-001 | 2.340e-004  |
| 9     | 2.890e+001 | 1.311e-001 | 1.331e-001 | 1.995e-003  |
| 10    | 3.237e+001 | 9.536e-002 | 9.787e-002 | 2.510e-003  |
| 11    | 3.584e+001 | 6.757e-002 | 6.951e-002 | 1.942e-003  |
| 12    | 3.931e+001 | 4.615e-002 | 4.768e-002 | 1.530e-003  |
| 13    | 4.278e+001 | 3.059e-002 | 3.159e-002 | 1.004e-003  |
| 14    | 4.626e+001 | 1.950e-002 | 2.021e-002 | 7.161e-004  |
| 15    | 4.973e+001 | 1.204e-002 | 1.249e-002 | 4.490e-004  |
| 16    | 5.320e+001 | 7.309e-003 | 7.453e-003 | 1.443e-004  |

-----  
16 points for Integral 5, Integral Region from 3.010 to 2.916 ppm

Converged after 52 iterations!

Results Comp. 1

I[0] - 4.140e-001  
Diff Con. - 1.992e-010 m2/s  
Gamma - 4.258e+003 Hz/G  
Little Delta - 2.800m  
Big Delta - 129.900m

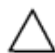

RSS - 2.550e-006

(3/5)

Thu Feb 01 17:38:52 CET 2018

SD - 3.992e-004

| Point | Gradient   | Expt       | Calc       | Difference  |
|-------|------------|------------|------------|-------------|
| 1     | 1.120e+000 | 4.129e-001 | 4.132e-001 | 2.881e-004  |
| 2     | 4.592e+000 | 4.012e-001 | 4.016e-001 | 3.664e-004  |
| 3     | 8.064e+000 | 3.770e-001 | 3.769e-001 | -4.665e-005 |
| 4     | 1.154e+001 | 3.423e-001 | 3.417e-001 | -5.386e-004 |
| 5     | 1.501e+001 | 2.992e-001 | 2.992e-001 | 8.430e-006  |
| 6     | 1.848e+001 | 2.539e-001 | 2.531e-001 | -8.258e-004 |
| 7     | 2.195e+001 | 2.068e-001 | 2.067e-001 | -1.277e-004 |
| 8     | 2.542e+001 | 1.625e-001 | 1.631e-001 | 5.916e-004  |
| 9     | 2.890e+001 | 1.238e-001 | 1.243e-001 | 4.884e-004  |
| 10    | 3.237e+001 | 9.093e-002 | 9.146e-002 | 5.332e-004  |
| 11    | 3.584e+001 | 6.534e-002 | 6.502e-002 | -3.260e-004 |
| 12    | 3.931e+001 | 4.492e-002 | 4.464e-002 | -2.750e-004 |
| 13    | 4.278e+001 | 2.940e-002 | 2.960e-002 | 1.988e-004  |
| 14    | 4.626e+001 | 1.925e-002 | 1.896e-002 | -2.925e-004 |
| 15    | 4.973e+001 | 1.213e-002 | 1.173e-002 | -4.022e-004 |
| 16    | 5.320e+001 | 6.997e-003 | 7.009e-003 | 1.113e-005  |

16 points for Integral 6, Integral Region from 2.634 to 2.594 ppm

Converged after 47 iterations!

Results Comp. 1

I[0] - 1.001e+000  
Diff Con. - 2.020e-010 m2/s  
Gamma - 4.258e+003 Hz/G  
Little Delta - 2.800m  
Big Delta - 129.900m

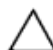

RSS - 4.965e-005

SD - 1.762e-003

| Point | Gradient   | Expt       | Calc       | Difference  |
|-------|------------|------------|------------|-------------|
| 1     | 1.120e+000 | 1.000e+000 | 9.995e-001 | -5.332e-004 |
| 2     | 4.592e+000 | 9.703e-001 | 9.709e-001 | 6.461e-004  |
| 3     | 8.064e+000 | 9.077e-001 | 9.105e-001 | 2.832e-003  |
| 4     | 1.154e+001 | 8.236e-001 | 8.243e-001 | 6.636e-004  |
| 5     | 1.501e+001 | 7.219e-001 | 7.204e-001 | -1.452e-003 |
| 6     | 1.848e+001 | 6.120e-001 | 6.078e-001 | -4.190e-003 |
| 7     | 2.195e+001 | 4.975e-001 | 4.951e-001 | -2.430e-003 |
| 8     | 2.542e+001 | 3.886e-001 | 3.893e-001 | 6.598e-004  |
| 9     | 2.890e+001 | 2.935e-001 | 2.955e-001 | 2.016e-003  |
| 10    | 3.237e+001 | 2.135e-001 | 2.165e-001 | 2.973e-003  |
| 11    | 3.584e+001 | 1.523e-001 | 1.532e-001 | 8.856e-004  |
| 12    | 3.931e+001 | 1.044e-001 | 1.046e-001 | 2.320e-004  |

(4/5)

Thu Feb 01 17:38:52 CET 2018

|    |            |            |            |             |
|----|------------|------------|------------|-------------|
| 13 | 4.278e+001 | 6.931e-002 | 6.896e-002 | -3.559e-004 |
| 14 | 4.626e+001 | 4.422e-002 | 4.389e-002 | -3.338e-004 |
| 15 | 4.973e+001 | 2.736e-002 | 2.696e-002 | -3.974e-004 |
| 16 | 5.320e+001 | 1.658e-002 | 1.599e-002 | -5.875e-004 |

-----  
16 points for Integral 7, Integral Region from 2.594 to 2.581 ppm

Converged after 57 iterations!

Results Comp. 1

I[0] - 9.468e-002

Diff Con. - 1.898e-010 m2/s

Gamma - 4.258e+003 Hz/G

Little Delta - 2.800m

Big Delta - 129.900m

RSS - 1.521e-005

SD - 9.749e-004

| Point | Gradient   | Expt       | Calc       | Difference  |
|-------|------------|------------|------------|-------------|
| 1     | 1.120e+000 | 9.355e-002 | 9.451e-002 | 9.626e-004  |
| 2     | 4.592e+000 | 9.006e-002 | 9.198e-002 | 1.917e-003  |
| 3     | 8.064e+000 | 8.754e-002 | 8.659e-002 | -9.468e-004 |
| 4     | 1.154e+001 | 8.107e-002 | 7.886e-002 | -2.208e-003 |
| 5     | 1.501e+001 | 7.109e-002 | 6.949e-002 | -1.599e-003 |
| 6     | 1.848e+001 | 5.893e-002 | 5.923e-002 | 3.067e-004  |
| 7     | 2.195e+001 | 4.806e-002 | 4.885e-002 | 7.837e-004  |
| 8     | 2.542e+001 | 3.803e-002 | 3.897e-002 | 9.416e-004  |
| 9     | 2.890e+001 | 2.945e-002 | 3.008e-002 | 6.288e-004  |
| 10    | 3.237e+001 | 2.270e-002 | 2.246e-002 | -2.414e-004 |
| 11    | 3.584e+001 | 1.639e-002 | 1.622e-002 | -1.656e-004 |
| 12    | 3.931e+001 | 1.172e-002 | 1.134e-002 | -3.803e-004 |
| 13    | 4.278e+001 | 7.690e-003 | 7.666e-003 | -2.380e-005 |
| 14    | 4.626e+001 | 4.802e-003 | 5.014e-003 | 2.124e-004  |
| 15    | 4.973e+001 | 3.278e-003 | 3.173e-003 | -1.050e-004 |
| 16    | 5.320e+001 | 1.908e-003 | 1.942e-003 | 3.451e-005  |

-----

(5/5)

## CSI spectra of SCCs 2-4

### CSI mass spectrum of 2 (S9)

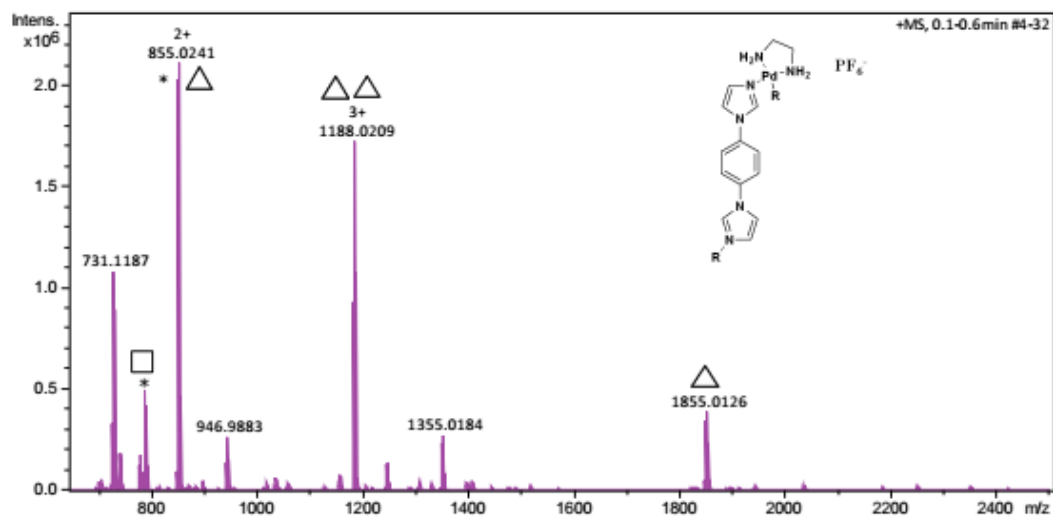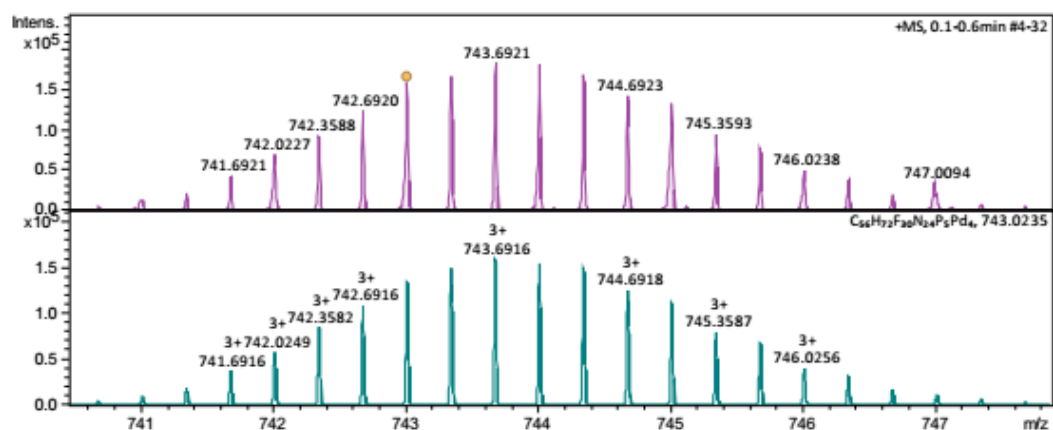

| Meas. m/z  | Ion Formula                                                                                    | m/z       | err [ppm] | mSigma | Adduct | z  |
|------------|------------------------------------------------------------------------------------------------|-----------|-----------|--------|--------|----|
| 743.023476 | C <sub>56</sub> H <sub>72</sub> F <sub>30</sub> N <sub>14</sub> P <sub>5</sub> Pd <sub>4</sub> | 743.02346 | 1.9       | 25.3   | M      | 3+ |

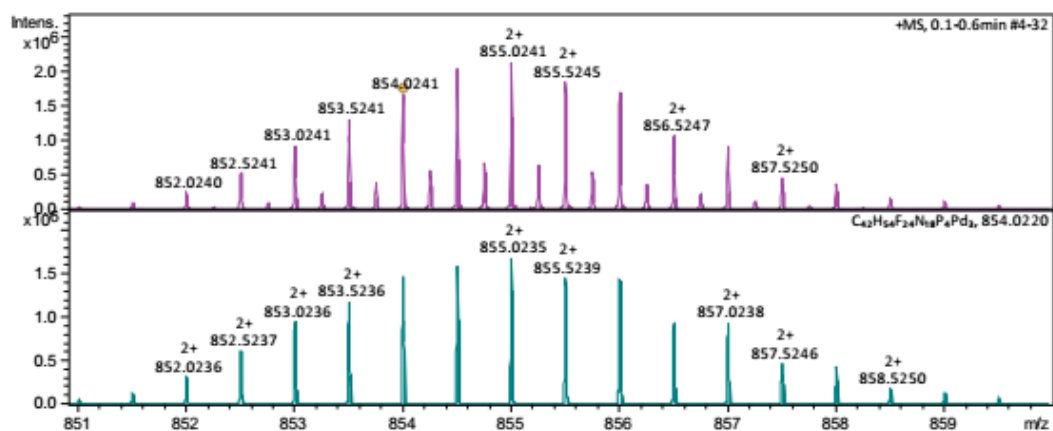

| Meas. m/z  | Ion Formula                                                                                    | m/z        | err [ppm] | mSigma | Adduct | z  |
|------------|------------------------------------------------------------------------------------------------|------------|-----------|--------|--------|----|
| 854.024074 | C <sub>42</sub> H <sub>54</sub> F <sub>24</sub> N <sub>18</sub> P <sub>4</sub> Pd <sub>3</sub> | 854.021984 | -0.7      | 18.3   | M      | 2+ |



CSI mass spectrum of **3** (S10)

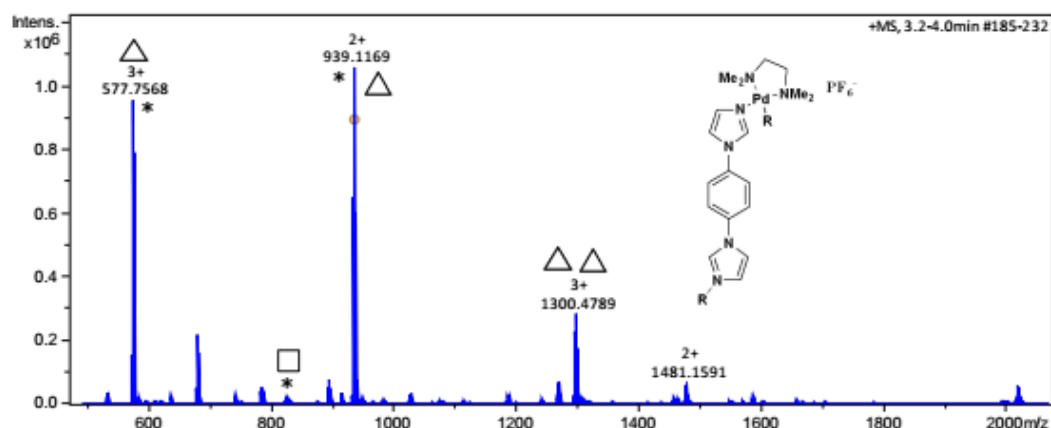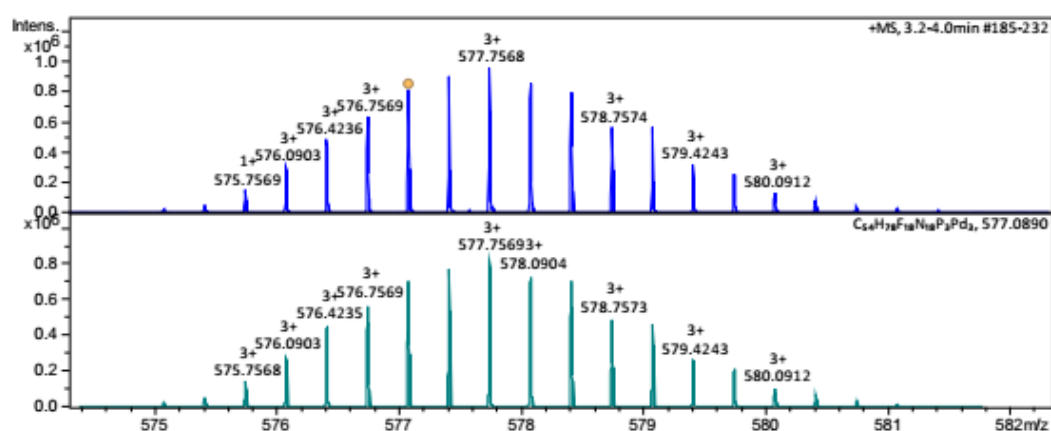

| Meas. m/z | Ion Formula     | m/z      | err [ppm] | mSigma | Score | Adduct | z  |
|-----------|-----------------|----------|-----------|--------|-------|--------|----|
| 577.0902  | C54H78F18N18Pd3 | 577.089  | -0.1      | 17.8   | 100   | M      | 3+ |
| 938.1169  | C54H78F24N18Pd4 | 938.1159 | 0.8       | 17.3   | 100   | M      | 2+ |

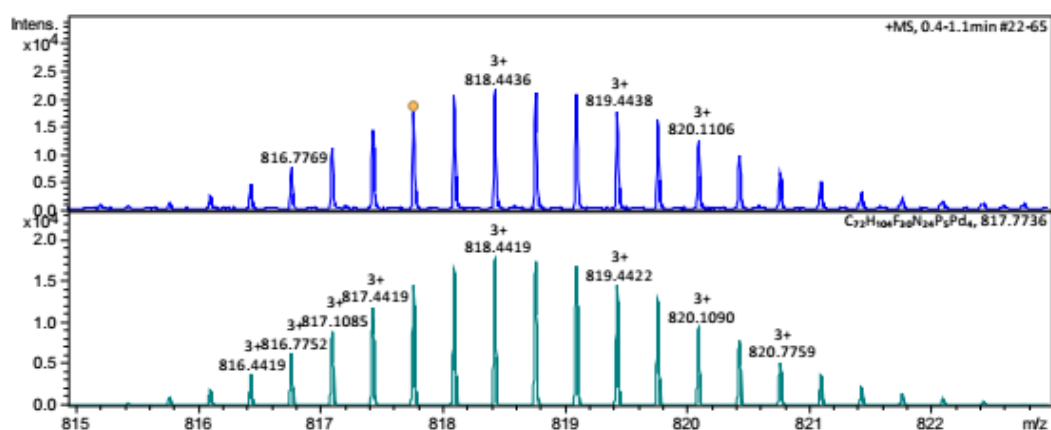

| Meas. m/z | Ion Formula      | m/z      | err [ppm] | mSigma | Score | Adduct | z  |
|-----------|------------------|----------|-----------|--------|-------|--------|----|
| 817.7768  | C72H104F30N24Pd4 | 817.7736 | -2        | 22.4   | 100   | M      | 3+ |

CSI mass spectrum of 4 (S11)

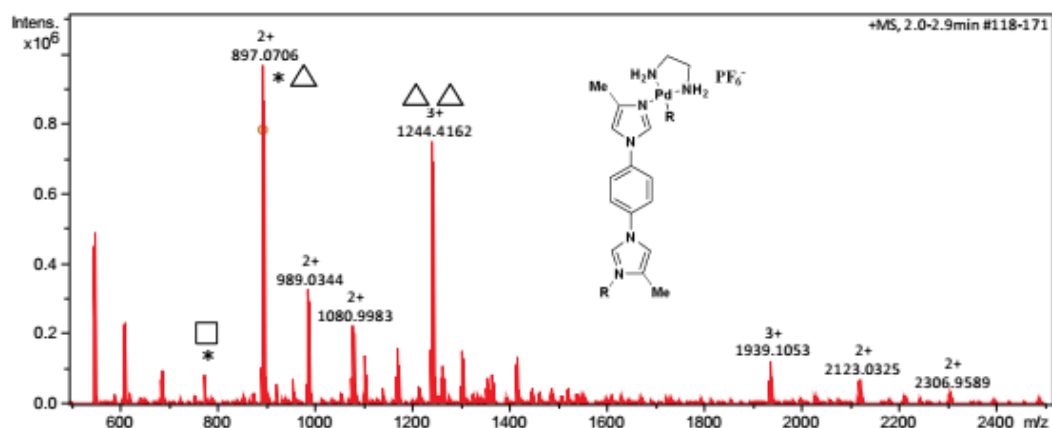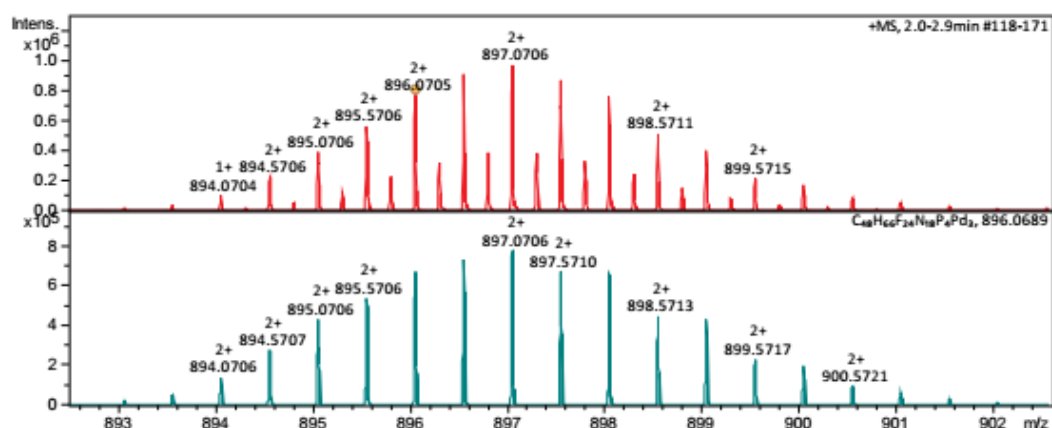

| Meas. m/z | Ion Formula     | m/z      | err [ppm] | mSigma | Score | Adduct | z  |
|-----------|-----------------|----------|-----------|--------|-------|--------|----|
| 896.0705  | C48H66F24N18Pd3 | 896.0689 | 0         | 18.4   | 100   | M      | 2+ |

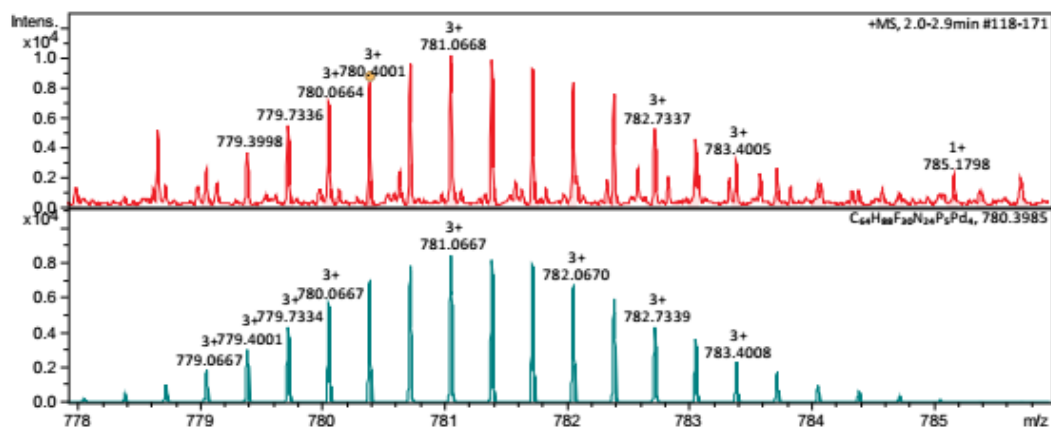

| Meas. m/z | Ion Formula       | m/z      | err [ppm] | mSigma | Score | Adduct | z  |
|-----------|-------------------|----------|-----------|--------|-------|--------|----|
| 780.4001  | C64H88F30N24P5Pd4 | 780.3985 | 0         | 26.9   | 100   | M      | 3+ |

CSI mass spectrum of 5 (S12)

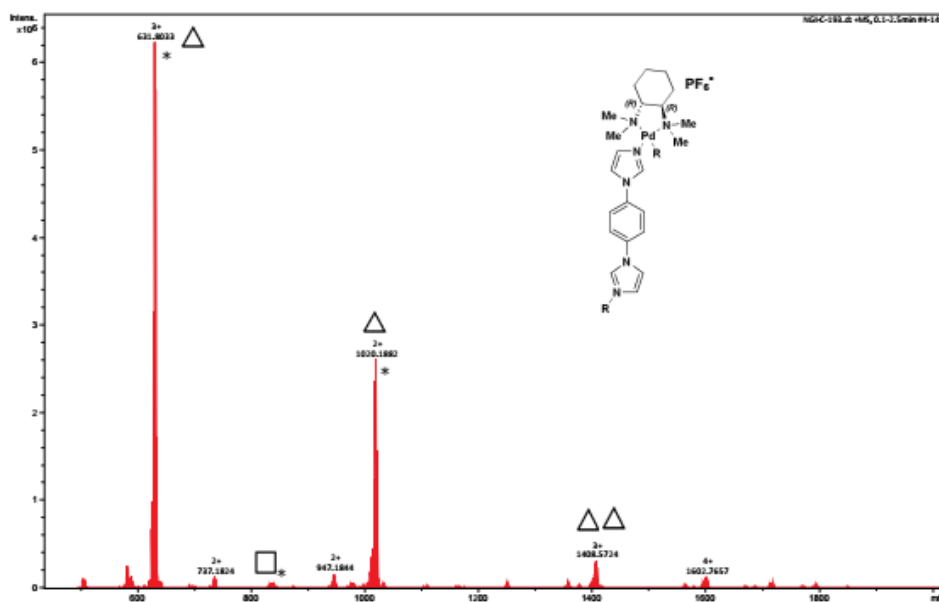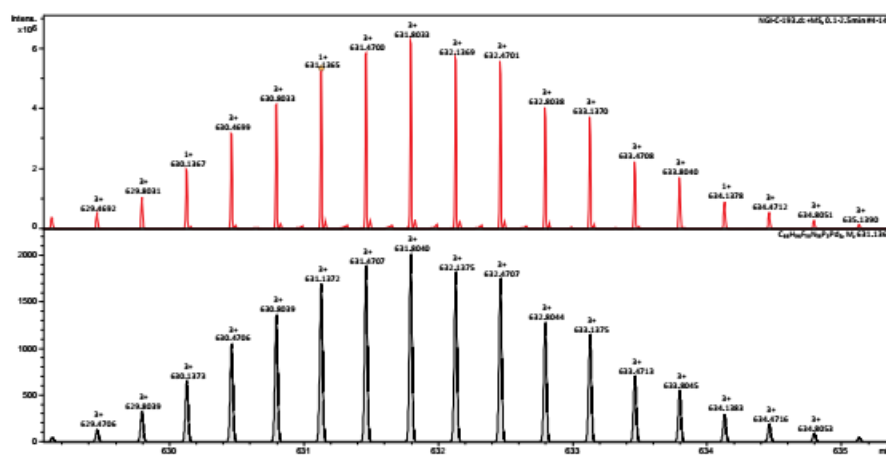

| Meas. m/z | Ion Formula       | m/z     | err [ppm] | mSigma | Score | Adduct | z  |
|-----------|-------------------|---------|-----------|--------|-------|--------|----|
| 631.1365  | C66H96F18N18P3Pd3 | 631.136 | 1.1       | 13.7   | 100   | M      | 1+ |

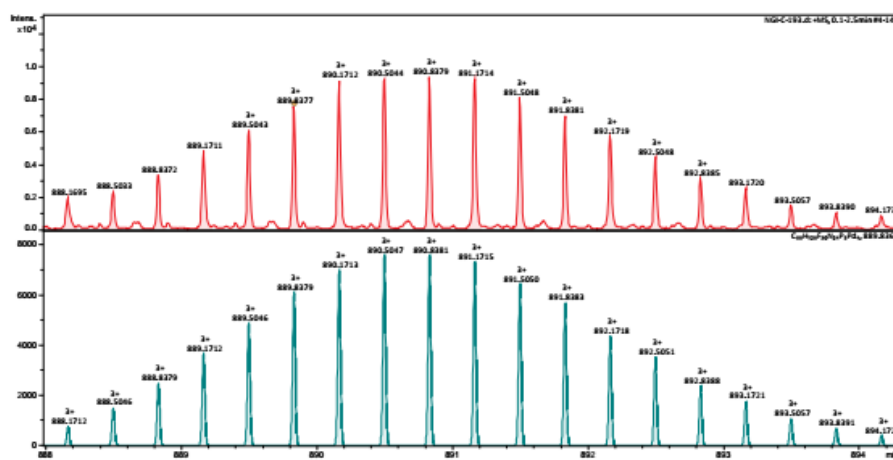

| Meas. m/z | Ion Formula        | m/z      | err [ppm] | mSigma | Score | Adduct | z  |
|-----------|--------------------|----------|-----------|--------|-------|--------|----|
| 889.8377  | C88H128F30N24P5Pd4 | 889.8362 | 0.3       | 46     | 100   | M      | 3+ |

## ROESY spectra of SCCs 2-4 at 233K

### ROESY spectrum of 2 at 233K

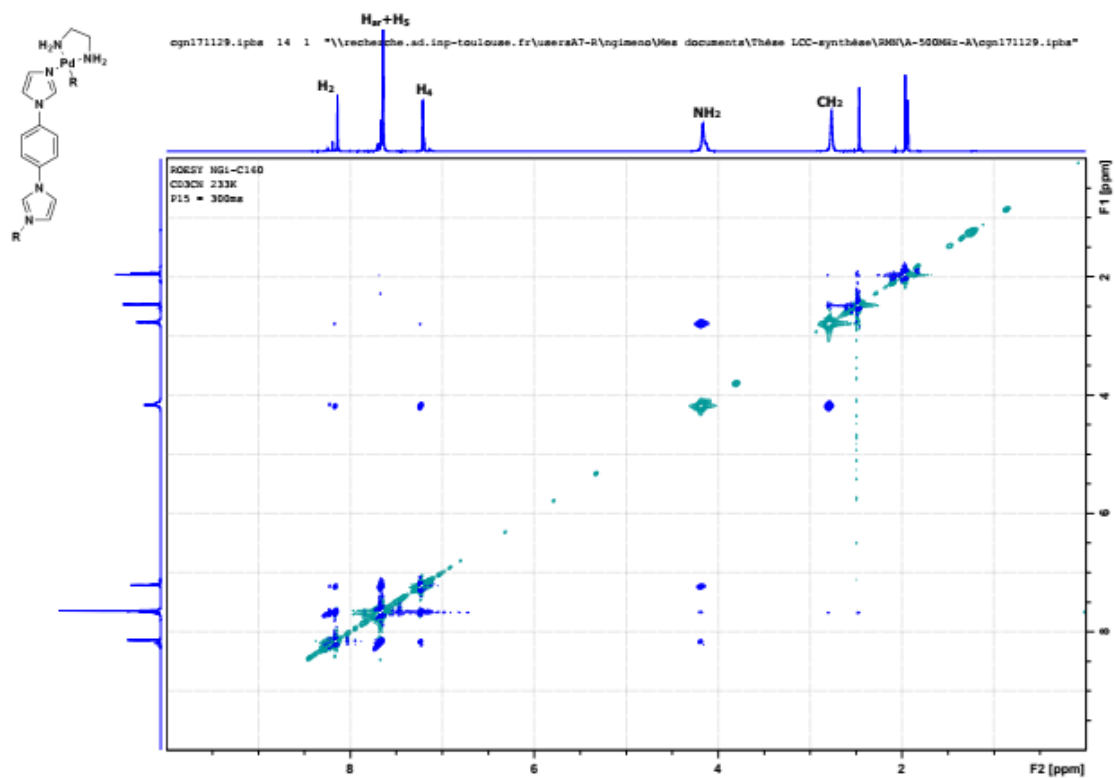

### ROESY spectrum of 3 at 233K

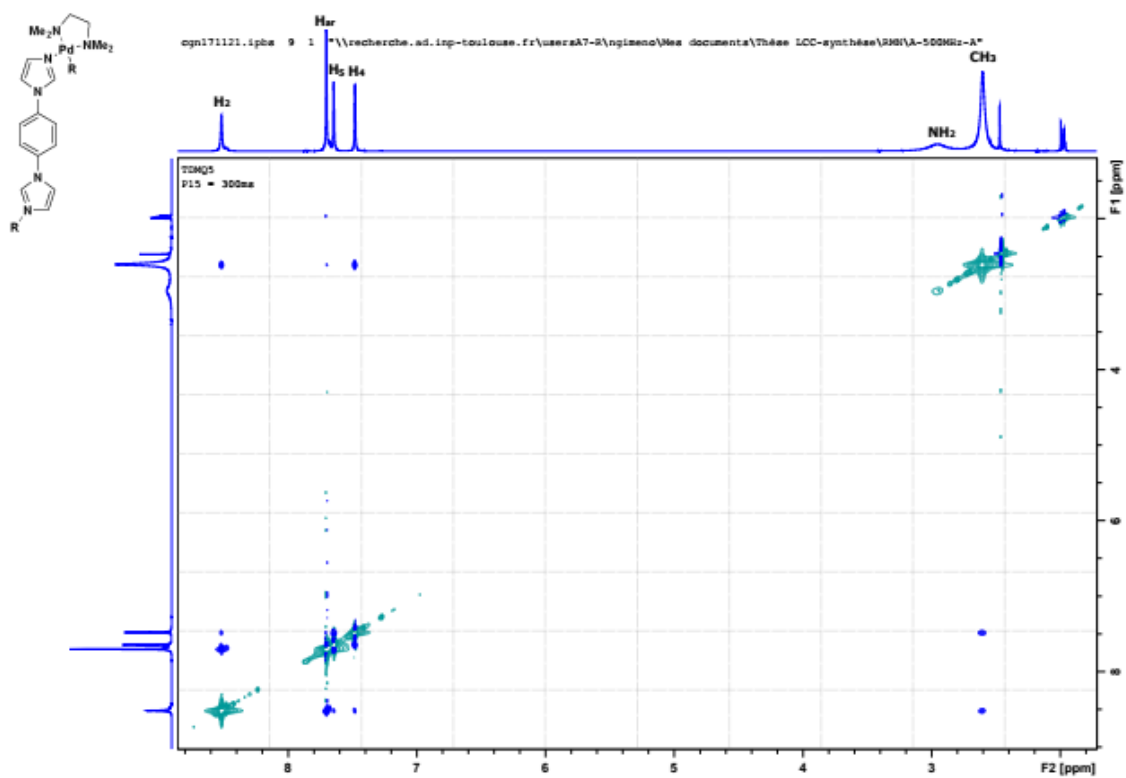

ROESY spectrum of 4 at 233K

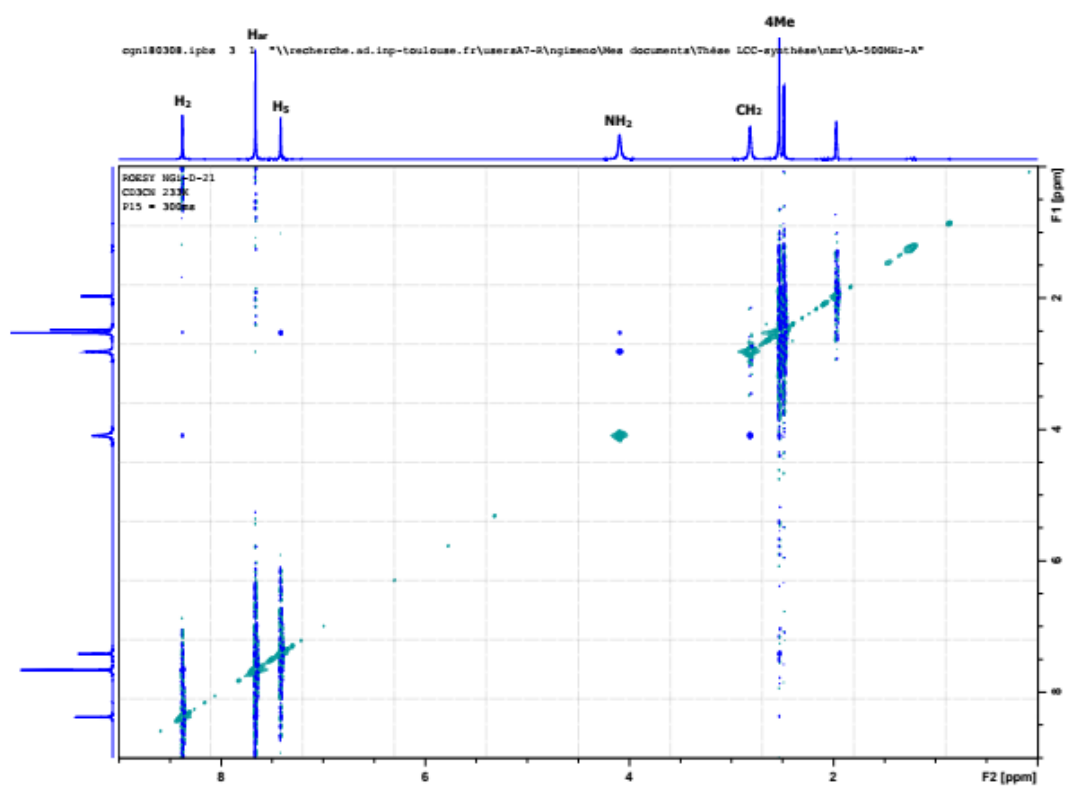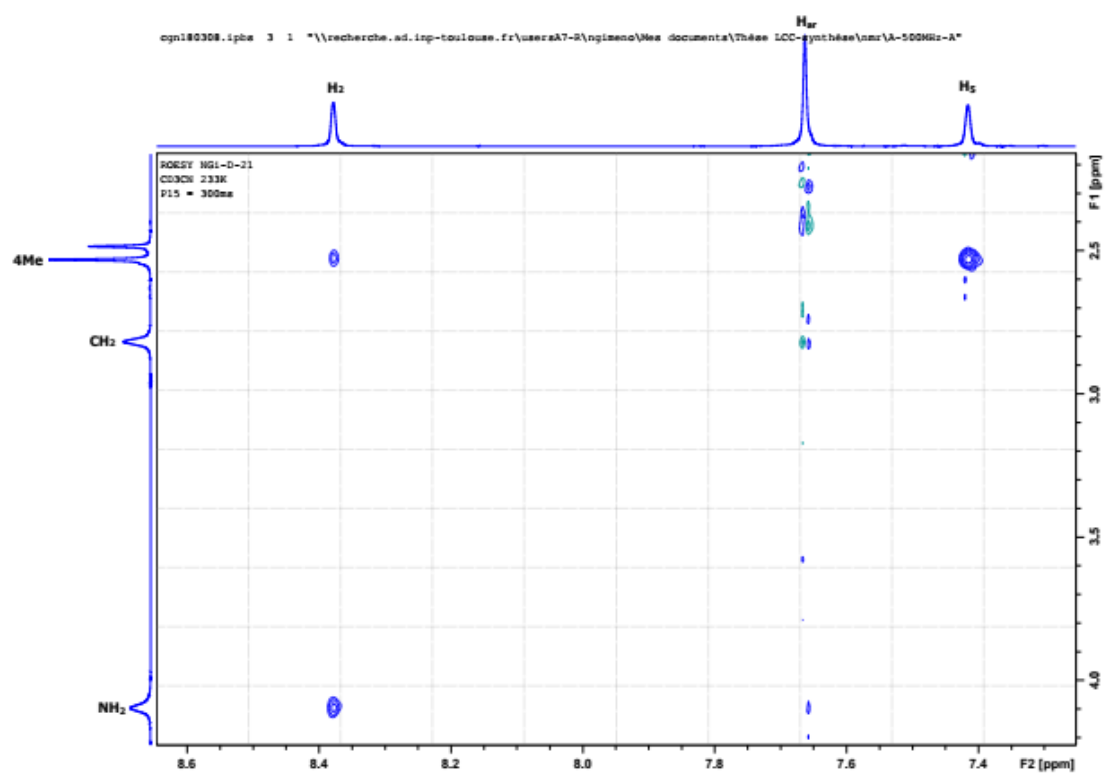

ROESY spectrum of **5** at 233K

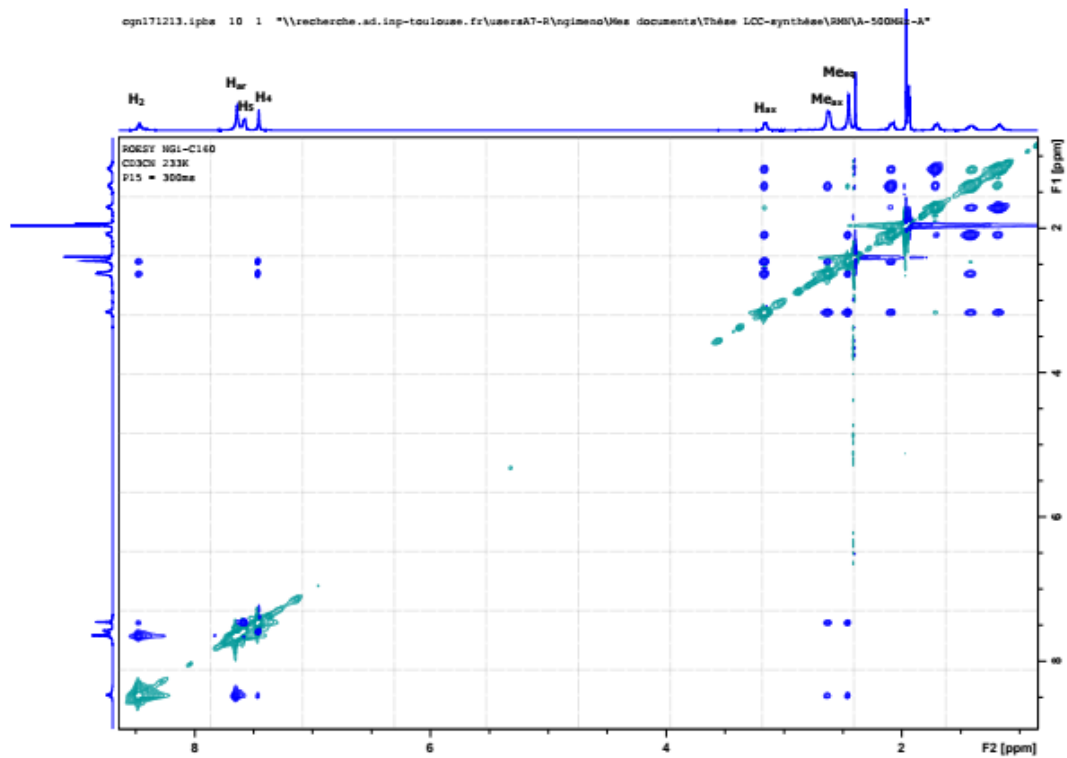

### $^1\text{H}$ VT-NMR spectra of SCCs 2-4

### $^1\text{H}$ VT-NMR spectra of 2

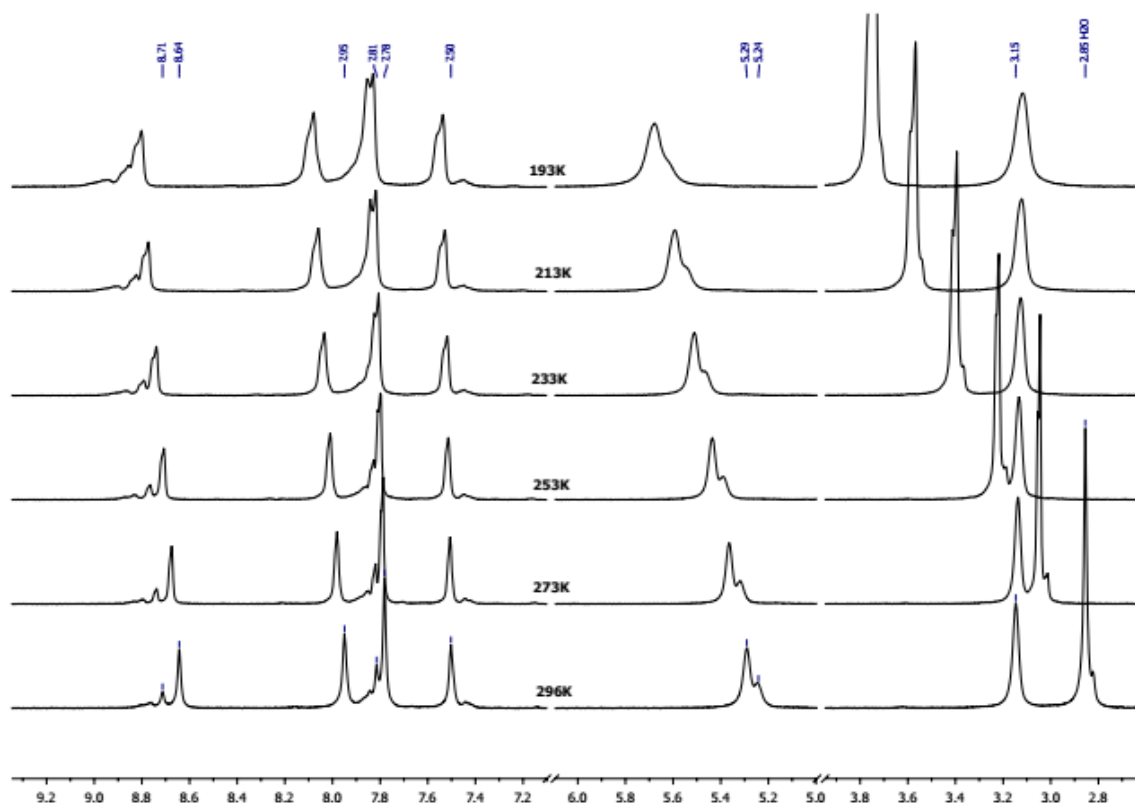

### $^1\text{H}$ VT-NMR spectra of 3 (S15)

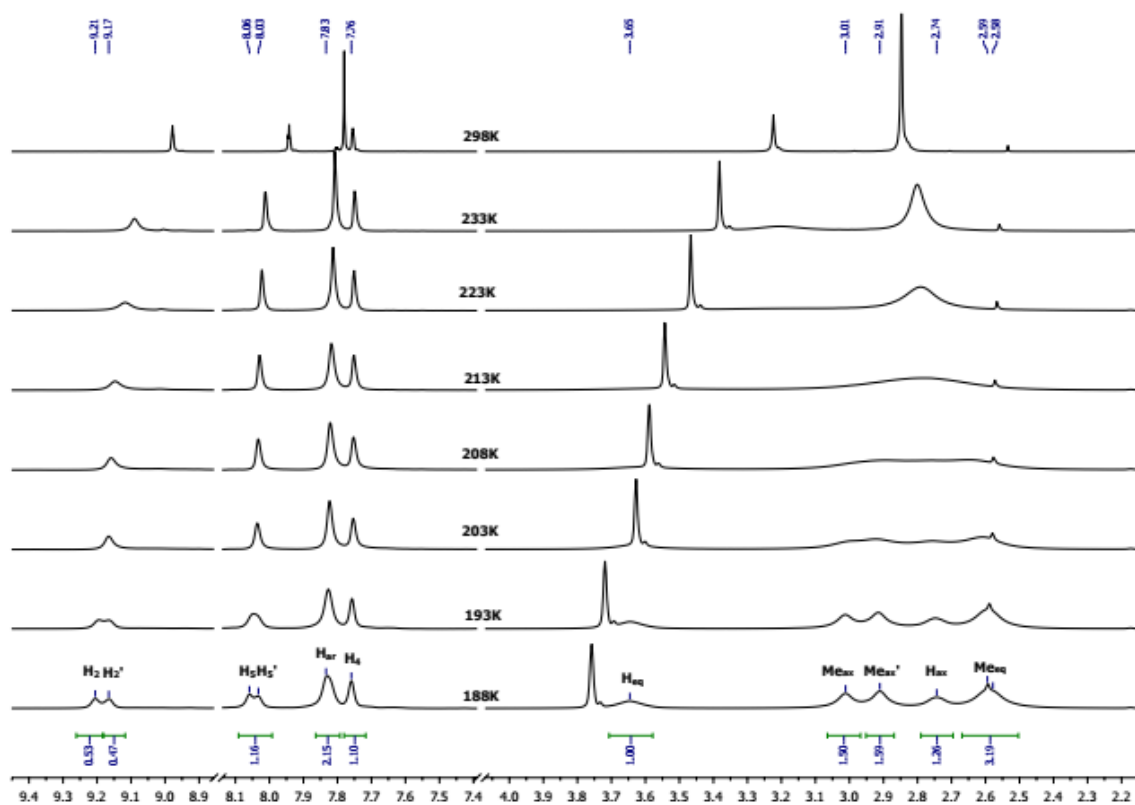

<sup>1</sup>H VT-NMR spectra of **4**

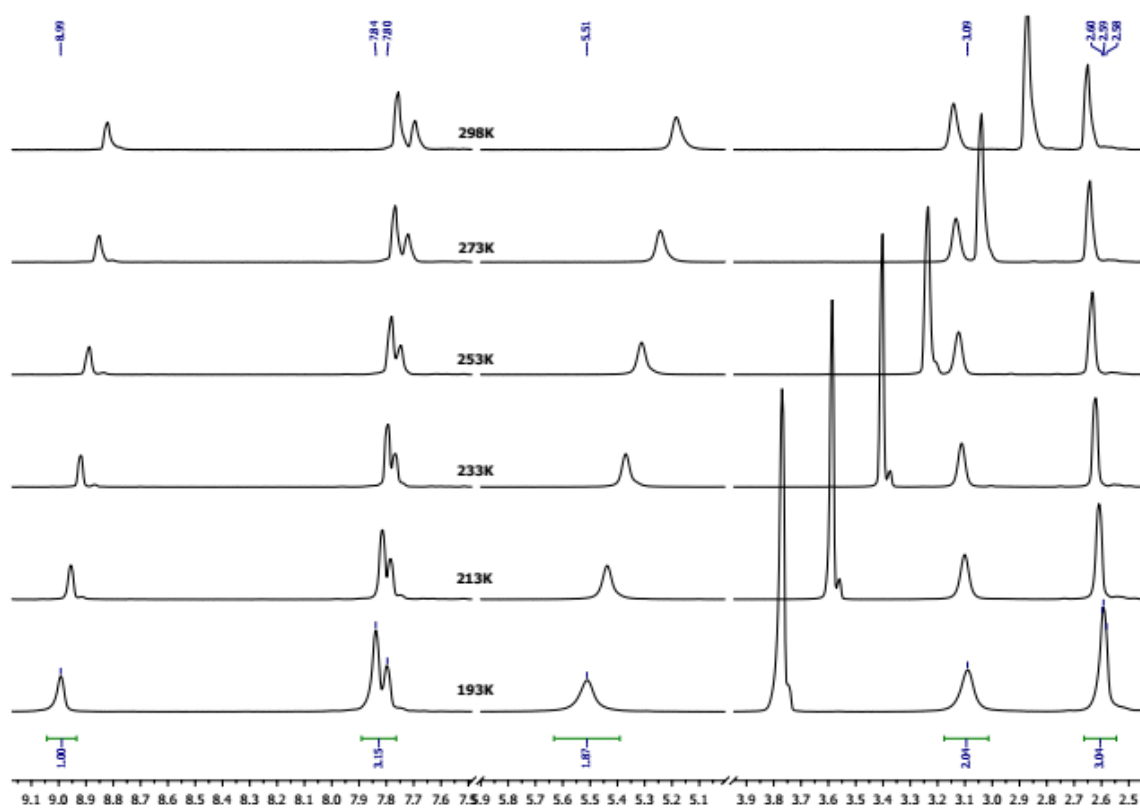

<sup>1</sup>H VT-NMR spectra of **5** (S14)

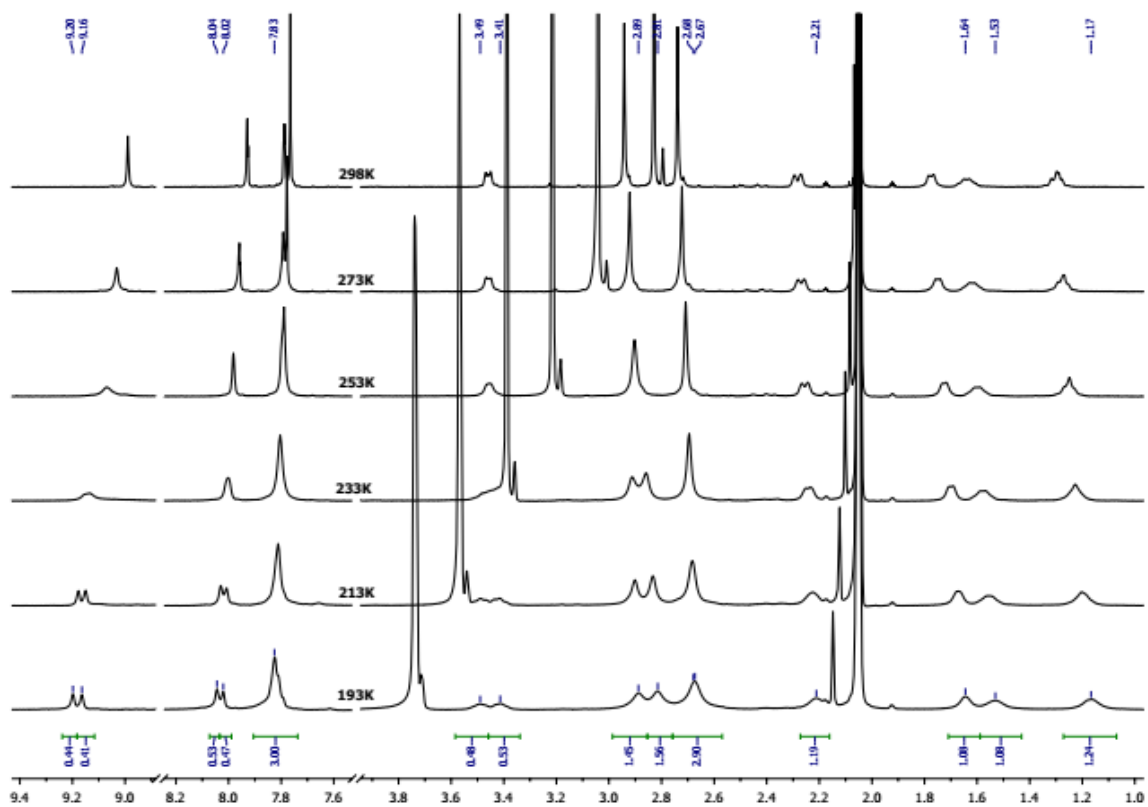



## ROESY NMR spectra of SCCs 3 and 5 at low temperatures

ROESY spectrum of **3** at 188K (S16)

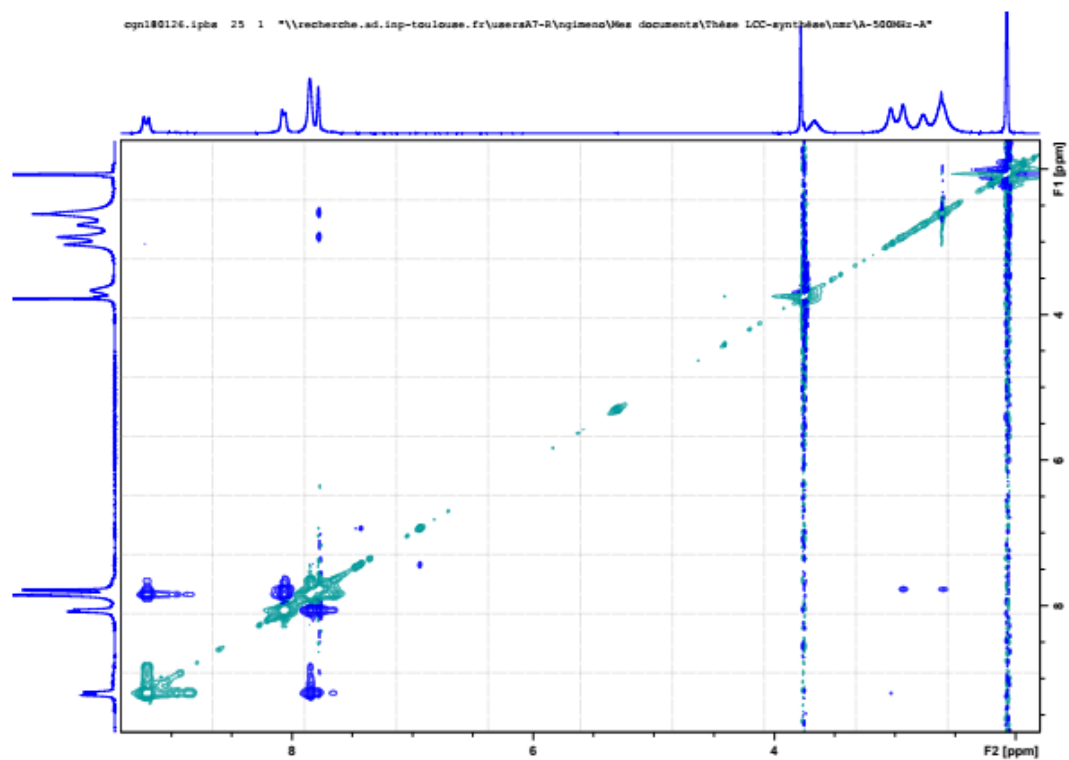

ROESY spectrum of **5** at 193K (S17)

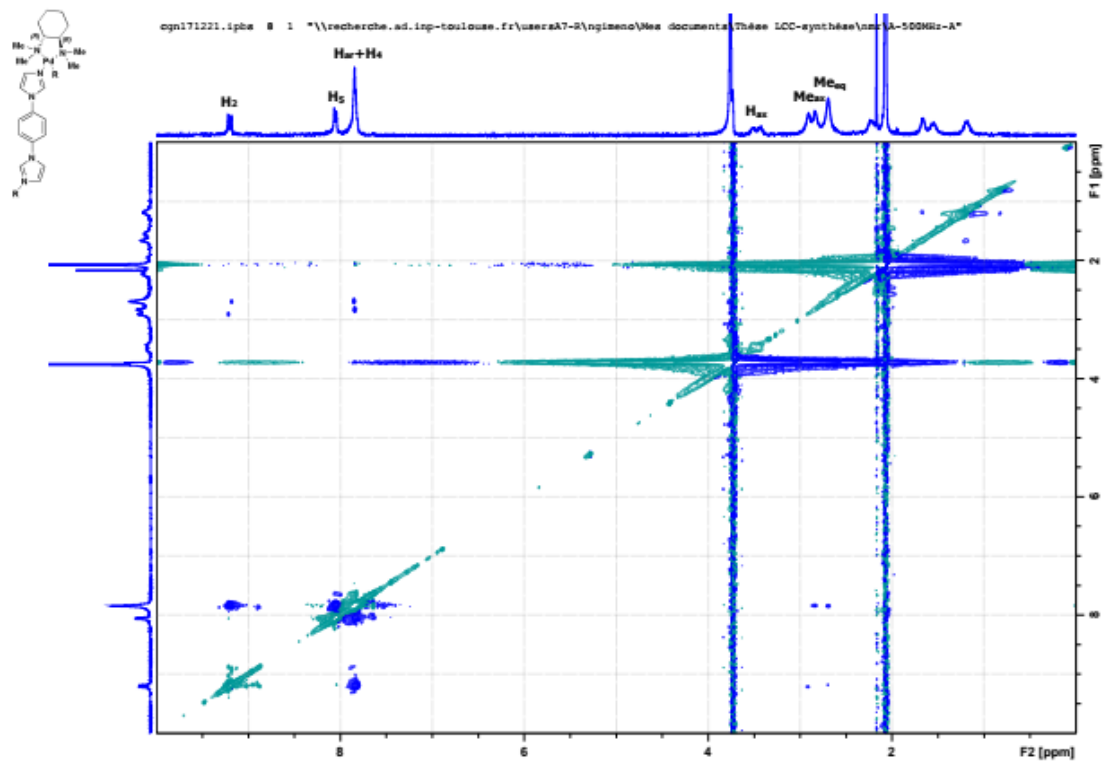

Supplement: c8nj02804d1.pdf [file c8nj02804d1.pdf]
